1 Manuscript type

2 Article

3

4 Title

5 **Specialized medial prefrontal-amygdala coordination in other-regarding decision**  
6 **preference**

7

8

9 Authors

10 Olga Dal Monte<sup>1,2</sup>, Cheng-Chi J. Chu<sup>1</sup>, Nicholas A. Fagan<sup>1</sup>, Steve W. C. Chang<sup>1,3,4,\*</sup>

11

12 Affiliations

13 1 Department of Psychology, Yale University, New Haven, CT 06520

14 2 Department of Psychology, University of Turin, Torino, Italy

15 3 Department of Neuroscience, Yale University School of Medicine, New Haven, CT 06510

16 4 Kavli Institute for Neuroscience, Yale University School of Medicine, New Haven, CT 06510

17

18

19 \*Corresponding Author

20 Steve W. C. Chang, Ph.D.

21 Email: [steve.chang@yale.edu](mailto:steve.chang@yale.edu)

22 Tel: 1-314-307-0498

23

24

25 Manuscript Information

26 Main Content: Main Text, 5 Figures

27 Abstract word count: 148

28 Main text word count: 5312 (excluding figure legends and methods)

29 Supplementary Information (Supplementary Results and 11 Supplemental Figures)

30

31

32 Key words

33 anterior cingulate cortex, amygdala, medial prefrontal cortex, coherence, spikes, local field potential,  
34 social decision-making

35

36

37

38

39

40 **Abstract**

41 Social behaviors recruit multiple cognitive processes requiring coordinated interactions among brain  
42 regions. Oscillatory coupling provides one mechanism for cortical and subcortical neurons to synchronize  
43 their activity. However, it remains unknown how neurons from different nodes in the social brain network  
44 interact when making social decisions. We investigated neuronal coupling between the rostral anterior  
45 cingulate gyrus of the medial prefrontal cortex and the basolateral amygdala while monkeys expressed  
46 context-dependent positive other-regarding preference (ORP) or negative ORP impacting the reward of  
47 another monkey. We found an enhanced synchronization between the two nodes for positive ORP, but a  
48 suppressed synchronization for negative ORP. These interactions occurred in dedicated frequency  
49 channels depending on the area contributing spikes, exhibited a specific directionality of information flow  
50 associated with expressing positive ORP, and could be used to decode social decisions. These findings  
51 support that specialized coordination in the medial prefrontal-amygdala network underlies social decision  
52 preference.

53 Altruistic behaviors and mutually-beneficial social exchanges facilitate social cohesion among  
54 members of a group and help attain collective rewards. While selfish behaviors can be detrimental to  
55 these causes, they may be strategically necessary to secure limited resources or achieve a certain social  
56 status. The cognitive operations central to making such social decisions are theorized to recruit a wide  
57 array of brain regions that are sensitive to primary and more abstract rewards, and span both cortical and  
58 subcortical areas with divergent functional specifications<sup>1-5</sup>.

59 Recent single-neuron studies using social decision-making paradigms involving pairs of monkeys  
60 have begun to characterize neuronal correlates of social decision variables concerning conspecific animals  
61 in several brain regions. These regions include the anterior cingulate cortex (ACC)<sup>6,7</sup>, the dorsomedial  
62 prefrontal cortex<sup>8</sup>, the basolateral amygdala (BLA)<sup>9-11</sup>, the orbitofrontal cortex (OFC)<sup>6,12</sup>, the striatum<sup>13</sup>,  
63 as well as the lateral prefrontal cortex<sup>14,15</sup>. Of these, the gyrus of the rostral ACC (ACCg) of the medial  
64 prefrontal cortex is thought to be particularly specialized in signaling rewarding and motivational  
65 information about social partners in both humans and monkeys<sup>1,16</sup>. Specifically, in a task where monkeys  
66 can express their other-regarding preferences (ORP) by choosing to deliver juice rewards to a conspecific  
67 monkey over discarding the rewards, some ACCg cells exclusively encode conspecific's rewards while  
68 other cells encode one's own reward and conspecific's reward in an indistinguishable manner<sup>6</sup>. By  
69 contrast, neurons in the OFC or in the sulcus of the ACC in the same paradigm predominantly signal self-  
70 referenced decision variables by modulating firing rates only in relation to one's received or foregone  
71 rewards<sup>6</sup>. These findings lend support for the role of rostral ACCg in computing other-referenced  
72 decisions<sup>16</sup>. On the other hand, BLA neurons, in the same behavioral task, exhibit systematically  
73 correlated firing rates for encoding monkeys' choices that result in juice rewards allocated to either  
74 themselves or the conspecific monkey<sup>9</sup>, suggesting that subcortical neurons in BLA utilize a shared  
75 metric for computing decision variables across self and other. These general neural characteristics in  
76 relation to social decision variables have also later been observed in ACCg and BLA neurons in the  
77 human brain in an intracranial study<sup>17</sup>. While brain regions like ACCg and BLA are implicated in social

78 decision-making, it is likely that the systematic synchronization across these and similar brain regions is  
79 what truly underlies such decisions.

80         Specialized coherence signature across specific nodes in the social brain network likely plays a  
81 key role in social cognition. Whole-brain functional neuroimaging studies in humans have indicated the  
82 potential importance of correlated hemodynamic fluctuations across different brain regions in regulating  
83 complex social cognition<sup>18,19</sup>. In prairie voles, frequency-specific coupling between medial prefrontal  
84 cortex and nucleus accumbens is shown to mediate social bonding<sup>20</sup>. Moreover, ACC neurons in the  
85 medial prefrontal cortex network that directly project to BLA are found to be necessary for observational  
86 fear learning and social preference formation in mice<sup>21</sup>. In turn, dysregulated subcortical-medial  
87 prefrontal synchrony could result in abnormal social behaviors<sup>22</sup>. However, while there is growing  
88 evidence for the importance of interactive coordination, neuronal mechanisms underlying interareal  
89 synchrony associated with complex social behaviors, such as those related to positive or negative ORP,  
90 remain elusive.

91         Reciprocally and densely innervating anatomical projections between ACCg and BLA permit the  
92 two nodes to efficiently communicate with one another for processing social and affective  
93 information<sup>23,24</sup>. However, whether and how ACCg and BLA coordinate their activity in relation to social  
94 decision-making remain unknown. If coordinated interactions between ACCg and BLA were involved in  
95 the expression of either positive or negative ORP concerning the welfare of others, one might expect  
96 distinctive coordination patterns to exist for two different types of expressed ORPs. Such coordinated  
97 interaction may be mediated by a dedicated frequency channel with a specific information flow between  
98 ACCg and BLA associated with expressing social decision preferences. To directly test this hypothesis,  
99 we investigated how single-neuron spiking and local field potential (LFP) activity between ACCg and  
100 BLA are dynamically coordinated as monkeys expressed positive ORP or negative ORP toward a  
101 conspecific monkey. We used spike-field coherence as our primary measure as it quantifies how spiking  
102 activity from one brain region is synchronized to oscillatory LFP activity from another brain region in

103 discrete time and frequency windows, allowing inspections of synchronous coordination of neural activity  
104 across brain areas<sup>25,26</sup>.

105 We found that synchrony between spiking and LFP oscillations in the two nodes differentiated  
106 monkeys' positive ORP in one context (via enhanced spike-field coherence) from negative ORP in  
107 another context (via suppressed spike-field coherence). Moreover, these synchrony patterns were specific  
108 to select frequency bands and time windows, and support a directional relationship of information transfer  
109 between the two nodes. Taken together, our findings demonstrate that unique rhythmic coordination of  
110 neuronal activity in the primate medial prefrontal-amygdala network contributes to context-specific social  
111 decision-making.

112

## 113 **Results**

### 114 **Monkeys exhibit positive ORP and negative ORP in distinct contexts**

115 Pairs of rhesus macaques (an actor and a recipient) participated in the social reward allocation  
116 task (**Fig. 1a-b**; Online Methods). In one decision context (*Other/Bottle* context) where actor monkeys  
117 never received juice rewards, actors were free to choose between donating a juice drop to a recipient  
118 (*Other*) and to a juice collection bottle (*Bottle*). In the other decision context (*Self/Both* context) where  
119 actors always received juice rewards, actors were free to choose between delivering juice rewards to  
120 themselves (*Self*) and to both themselves and the other monkey (*Both*). There were three magnitudes of  
121 juice reward offered (Online Methods), and actors were informed of the value at stake on each trial. This  
122 task therefore measures actor's social decision preference without self-reward confound in choosing one  
123 option over the other in two separate contexts.

124 Actors completed  $313 \pm 109$  (mean  $\pm$  s.d.) trials per session across 57 sessions (monkey H:  $374 \pm$   
125  $110$  per session, 31 sessions; monkey K:  $240 \pm 43$  per session, 26 sessions). Consistent with previous  
126 findings using this behavioral design<sup>6,9,27,28</sup>, actors preferred to choose *Other* over *Bottle*, exhibiting a  
127 positive ORP (preference index, mean  $\pm$  s.e.m.:  $0.32 \pm 0.02$ ,  $p < 0.0001$ , Wilcoxon sign rank) in the

128 *Other/Bottle* context, but preferred to choose *Self* over *Both*, displaying a negative ORP in the *Self/Both*  
 129 context ( $-0.08 \pm 0.02$ ,  $p < 0.001$ ) (**Fig. 1c**). These context-dependent preferences were consistent and  
 130 stable over time of each session (*Self/Both* and *Other/Bottle* context: both  $p > 0.52$ , linear regression, **Fig.**  
 131 **1c**)<sup>9,27</sup>, have been observed across several different animals in independent studies<sup>6,9,27,28</sup>, are sensitive to  
 132 dominance and familiarity between pairs<sup>27</sup>, and are abolished if the recipient monkey is replaced with a  
 133 juice collection bottle<sup>27</sup>.

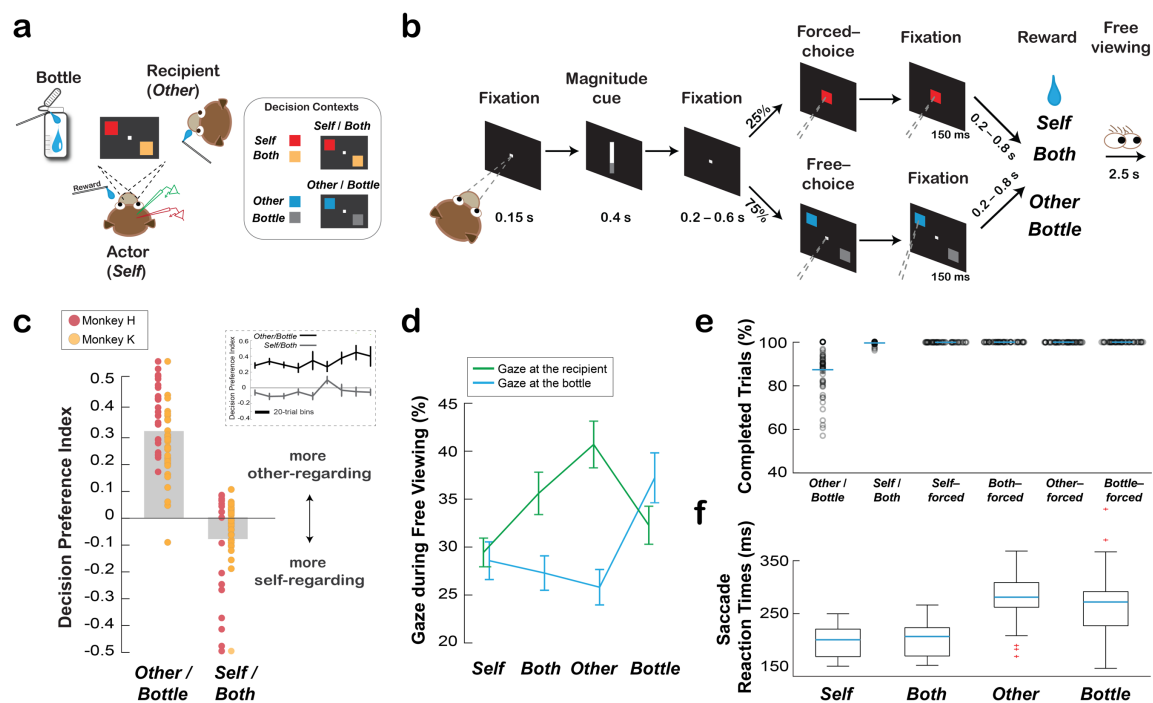

134  
 135 **Fig. 1. Social reward allocation task and the behaviors associated with social decision preference.** (a)  
 136 Experimental setting involving an actor monkey, a recipient monkey, and an operating juice collection bottle. The  
 137 inset shows example stimulus-reward outcome mappings for the two distinct contexts for rewarding the actor (*Self*)  
 138 or both the actor and the recipient (*Both*) (*Self/Both* context), and for rewarding the recipient (*Other*) or the bottle  
 139 (*Bottle*) (*Other/Bottle* context). (b) Task sequence for the social reward allocation task (Online Methods). (c)  
 140 Monkeys exhibited context-dependent positive and negative ORPs. Decision preferences are expressed as averaged  
 141 contrast ratios for the two decision contexts. Data points overlaid on top show the biases for all individual sessions  
 142 for each subject. The inset shows the preferences over time for each context. (d) Social gaze patterns reflected  
 143 decisions to deliver juice rewards to the recipient or the bottle as a function of different decisions. Shown are the  
 144 mean ( $\pm$  s.e.m.) proportions of gaze to the recipient or to the bottle during the free viewing period for each reward  
 145 outcome. (e) Average proportions of completed free-choice trials for *Other/Bottle* and *Self/Both* contexts and  
 146 completed forced-choice trials for choosing *Self*, *Both*, *Other*, or *Bottle*. Data points show individual sessions. (f)  
 147 Saccade reaction times (mean  $\pm$  s.e.m.) for choosing *Self*, *Both*, *Other*, or *Bottle*.

148

149 Social gaze patterns differed as a function of decision (*Self*, *Both*, *Other*, *Bottle*) ( $F[3, 455] =$   
150  $2.86, p = 0.037$ ) and gaze-goal (the recipient or the bottle) ( $F[1, 455] = 10.66, p = 0.001$ ). Critically,  
151 decision type and gaze-goal showed a strong interaction ( $F[3, 455] = 8.75, p < 0.0001$ ), indicating that  
152 social gaze differed across decision types. Across all decision outcomes, actors looked at the recipient ( $36$   
153  $\pm 1\%$  [mean  $\pm$  s.e.m.]) at a higher rate than to the bottle ( $30 \pm 1\%$ ,  $p = 0.001$ , Tukey test). Importantly,  
154 after choosing *Other*, actors looked at the recipient ( $41 \pm 2\%$ ) more frequently compared to the bottle ( $26$   
155  $\pm 2\%$ ,  $p < 0.0001$ ). By contrast, actors looked at the bottle more often after choosing *Bottle* ( $37 \pm 3\%$ )  
156 than after choosing *Other* ( $26 \pm 2\%$ ) ( $p = 0.002$ ) (**Fig. 1d**). These observations support that actors were  
157 acutely aware of the reward outcome differences between the two conditions in which rewards were  
158 either allocated to the recipient or the bottle, the two outcomes without a self-reward contingency<sup>6,9,27,28</sup>.  
159 These context-dependent social decision preferences of the actor monkeys provide a behavioral  
160 framework for examining the coordination between ACCg and BLA in expressing positive and negative  
161 ORPs toward a conspecific monkey under different contexts.

162 As expected during free-choice trials, actors overall completed more *Self/Both* trials (greater than  
163 99% for all reward sizes) compared to *Other/Bottle* trials (87% for all reward sizes) ( $F[1,341] = 175.12, p$   
164  $< 0.0001$ ) (**Fig. 1e**). However, actors were more motivated to complete *Other/Bottle* trials when the  
165 reward size at stake for either the recipient or the bottle was larger (small:  $83 \pm 2\%$ , medium:  $87 \pm 2\%$ ,  
166 large:  $90 \pm 2\%$ ;  $F[2,168] = 4.3, p = 0.02$ ). On forced-choice trials, performance was at ceiling and did not  
167 differ across outcomes. Saccade reaction times on free-choice trials differed as a function of decision (*Self*  
168 [ $197 \text{ ms} \pm 27 \text{ ms}$ ], *Both* [ $200 \text{ ms} \pm 29 \text{ ms}$ ], *Other* [ $278 \text{ ms} \pm 43 \text{ ms}$ ], *Bottle* [ $271 \text{ ms} \pm 59 \text{ ms}$ ];  $F[3, 215] =$   
169  $59, p < 0.0001$ ) (**Fig. 1f**), driven by the differences in reaction times for receiving rewards (*Self* or *Both*)  
170 compared to forgoing rewards (*Other* or *Bottle*) ( $p < 0.0001$ , Wilcoxon rank sum; *Self* vs. *Both*, *Other* vs.  
171 *Bottle*, both  $p > 0.75$ ; *Self* or *Both* vs. *Other* or *Bottle*, all  $p < 0.001$ , Tukey test).

172

173 **Coordination of spiking and LFP activity between ACCg and BLA**

174 Exploiting monkeys' context-dependent positive and negative ORPs, we investigated neural  
175 coordination relating spiking and LFP activity associated with the two types of ORPs between rostral  
176 ACCg (Brodmann areas 24a, 24b, and 32)<sup>29</sup> and BLA<sup>29</sup> (**Fig. 2**). All single units were recorded without  
177 any sampling criterion, resulting in 253 ACCg cells and 90 BLA cells. **Figure S1** shows basic  
178 characterizations of the single cell activity as well as example cells with outcome selective response  
179 profiles. As we have previously characterized single-cell encoding of social decision variables within  
180 ACCg and BLA in the identical social reward allocation task<sup>6,9</sup>, in this study we mainly focused on  
181 determining coordination in frequency and time between ACCg and BLA at the level of single cells and  
182 populations.

183

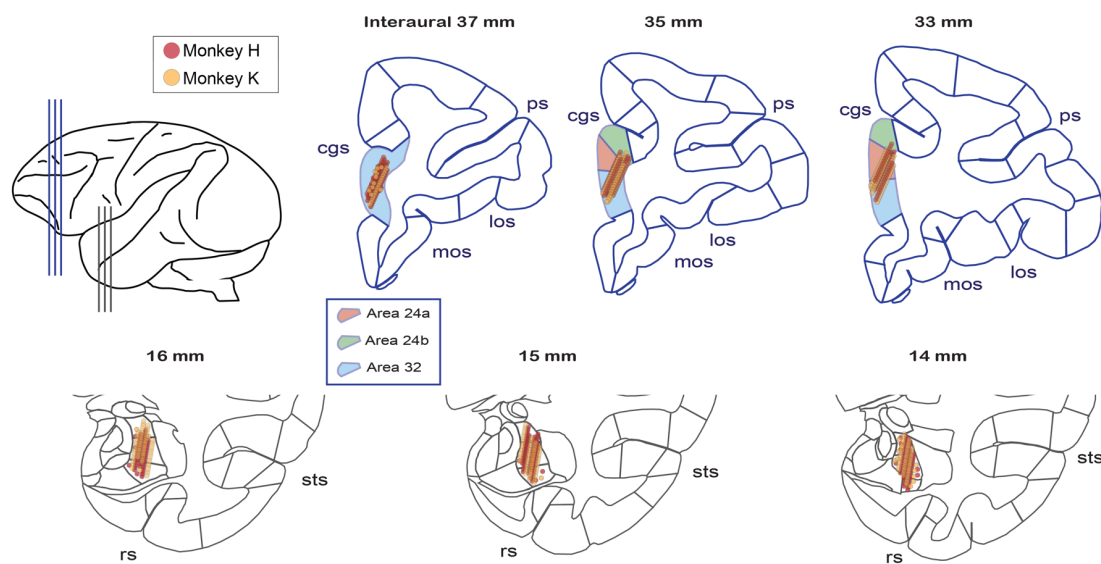

185 **Fig. 2. Anatomical locations investigated for the coordination of spiking and LFP activity between BLA and**  
186 **ACCg.** Recording locations for individual cells and LFP sites from monkey H (red points) and monkey K (orange  
187 points) projected onto the standard stereotaxic coordinates of the rhesus macaque brain atlas<sup>29</sup>. For each area's  
188 projections, three representative coronal slices were chosen with a 2-mm interaural spacing for ACCg and with a 1-  
189 mm interaural spacing for BLA in the anterior-to-posterior dimension (as shown in the top left cartoon). Selected  
190 landmarks are labeled: cingulate sulcus (cgs), principle sulcus (ps), medial orbitofrontal sulcus (mos), lateral  
191 orbitofrontal sulcus (los), superior temporal sulcus (sts), and rhinal sulcus (rs). Boxed inset shows region  
192 assignments for the ACC Brodmann names based on the Paxinos atlas<sup>29</sup>.

193



194 To determine whether and how neuronal coordination between BLA and ACCg might underlie  
195 social decision-making, we related spiking activity of individual cells from each area with LFP  
196 oscillations from the other area by calculating spike-field coherence from pairs of neurons and LFP  
197 sites<sup>25,26</sup>. Spike-field coherence values were computed from all recorded cells and LFP sites from which  
198 we collected the neural data without any selection criteria. This resulted in 253 ACCg cells paired with  
199 268 BLA LFP sites (ACCg<sub>spike</sub>-BLA<sub>field</sub>) and 90 BLA cells paired with 257 ACCg LFP sites (BLA<sub>spike</sub>-  
200 ACCg<sub>field</sub>). In particular, we analyzed coherence patterns during the 150 ms period from the time of  
201 acquiring a choice target on free-choice trials (post-decision epoch) and also during the 150 ms period  
202 from the central cue onset on forced-choice trials, in order to examine coherence patterns specific to  
203 active decisions. Importantly, during this epoch, actors were required to maintain gaze fixation on the  
204 target for the duration of the epoch to complete their response, thus removing any eye movement  
205 confound and also allowing us to match the timing and gaze-fixation precisely between the free- and  
206 forced-choice trials. Most crucially, coherence values were always compared in a relative, reward-  
207 matched, fashion (i.e., *Other–Bottle* for positive ORP, and *Self–Both* for negative ORP) such that any  
208 observed coherence differences could not be confounded by actors' contingency for receiving a juice  
209 reward. That is, actors never received rewards in the *Other/Bottle* context, but always received rewards in  
210 the *Self/Both* context, and the use of the *Other–Bottle* and *Self–Both* contrasts effectively removes any  
211 self-reward contingency within the two independent contexts.

212 Differences in spike-field coherence between expressed positive ORP (choosing *Other* over  
213 *Bottle*, *Other–Bottle*) and expressed negative ORP (choosing *Self* over *Both*, *Self–Both*) exhibited  
214 frequency-specific coordination as a function of the area that contributed spikes in the pair. Spikes from  
215 BLA cells and the LFP from ACCg (BLA<sub>spike</sub>-ACCg<sub>field</sub>) displayed enhanced coherence in the beta  
216 frequency range (defined here as 15–25 Hz) for positive ORP ( $p < 0.0001$ , Wilcoxon sign rank) but  
217 suppressed coherence in the same band for negative ORP ( $p < 0.0001$ ) (difference between positive and  
218 negative ORPs:  $p < 0.0001$ , Wilcoxon sign rank; **Fig. 3a-c** and **Fig. S2**). (**Figure 3a, 3d**, and **3g** show the  
219 differences of spike-field coherence values between positive and negative ORPs, whereas **Figures 3b, 3e**

220 and **S2** show spike-field coherence values for each decision preference separately). This enhanced versus  
221 suppressed coherence difference was present immediately prior to the time of free-choice decision and  
222 lasted until around the time of completing the decision (post-decision epoch). By contrast, in the gamma  
223 frequency range (defined here as 45–70 Hz), spikes from ACCg cells and LFP from BLA (ACCg<sub>spike</sub>-  
224 BLA<sub>field</sub>) exhibited enhanced coherence, again, for positive ORP ( $p < 0.0001$ ) but suppressed coherence  
225 for negative ORP in the same epoch ( $p < 0.0001$ ) (difference:  $p < 0.0001$ ; **Fig. 3d-f**). This coherence  
226 difference was also present prior to the time of free-choice decision and lasted until around the time of  
227 completing the decision. However, this time course appeared to be lagged in time compared to the  
228 BLA<sub>spike</sub>-ACCg<sub>field</sub> coherence in the beta band (**Fig. 3g**; described in more detail below). Additionally, the  
229 differences in spike-field coherence between expressing positive ORP and negative ORP did not change  
230 as a function of the temporal progression within a session, for both BLA<sub>spike</sub>-ACCg<sub>field</sub> coherence (beta  
231 band,  $p > 0.75$ ; gamma band,  $p > 0.11$ , linear regression) and ACCg<sub>spike</sub>-BLA<sub>field</sub> coherence (beta band,  $p >$   
232  $0.47$ ; gamma band,  $p > 0.45$ ).

233 Next, we investigated whether the observed spike-field coherence patterns were stronger for the  
234 subsets of BLA and ACCg cells that significantly differentiated decision outcomes (*Self*, *Both*, *Other*,  
235 *Bottle*; outcome selective cells) (**Fig. S1**). BLA cells with significant outcome selectivity (37%), exhibited  
236 stronger BLA<sub>spike</sub>-ACCg<sub>field</sub> coherence differences between positive and negative ORPs in the post-  
237 decision epoch, compared to the non-significant cells ( $p < 0.01$ , Wilcoxon rank sum; **Fig. 3h**). By  
238 contrast, ACCg cells with significant outcome selectivity (36%) did not differ in their ACCg<sub>spike</sub>-BLA<sub>field</sub>  
239 coherence differences between the two ORPs than the non-significant counterparts ( $p = 0.12$ ; **Fig. 3j**).  
240 These results suggest that outcome-differentiating cells in BLA may play a more specialized role for the  
241 BLA<sub>spike</sub>-ACCg<sub>field</sub> coupling patterns.

242 Finally, we performed several control analyses to further confirm the enhanced spike-field  
243 coupling between BLA and ACCg for expressing positive ORP. We first examined whether the observed  
244 spike-field coherence patterns were in any way influenced by actors' potential intention to look in the  
245 future at either the conspecific's face or the bottle during the inter-trial interval, even though the actors

246 were required to maintain gaze fixation steadily in the main analysis epoch. Specifically, we tested  
247 possible differences in spike-field coherence patterns (in all frequency bands) during the post-decision  
248 epoch on those trials where the actors ultimately looked at the face (compared to no future looking) as  
249 well as those trials where they ultimately looked at the bottle (compared to no future looking). Across all  
250 frequency bands examined, we did not observe marked differences. Crucially, we found no differences in  
251 the beta band  $BLA_{\text{spike}}-ACCg_{\text{field}}$  ( $p = 0.39$ , Wilcoxon rank sum; **Fig. 3i**) and the gamma band  $ACCg_{\text{spike}}-$   
252  $BLA_{\text{field}}$  coherence ( $p = 0.77$ , **Fig. 3k**) patterns, supporting that the observed spike-field coherence cannot  
253 be explained by potential anticipatory attentional allocation to the conspecific or the bottle. Second, we  
254 ruled out several additional factors from explaining our main findings. The observed spike-field  
255 coherence patterns were not simply driven by changes in spiking activity or LFP powers (**Fig. S3** and  
256 Supplemental Results, see also **Fig. S4** for LFP power temporal evolution in the beta and gamma bands),  
257 or by a more global-level synchrony or common input signals by comparing them to field-field coherence  
258 patterns (**Fig. S5** and Supplemental Results). We also examined whether the between-region spike-field  
259 coherence patterns reported here were different from the within-region spike-field coherence patterns and  
260 found that they were different in several ways (**Fig. S6** and Supplemental Results). Moreover, to test if  
261 similar coherence patterns were present even when we construct positive other-regarding and negative  
262 other-regarding choices in different ways (type 2 contrasts), we contrasted *Both–Self* for delivering  
263 rewards to the conspecific and *Bottle–Other* for not delivering rewards to the other monkey. We found  
264 largely consistent spike-field (**Fig. S7** and Supplemental Results) and field-field coherence patterns with  
265 the type 2 contrasts (**Fig. S8** and Supplemental Results), indicating that the spike-field coherence patterns  
266 are not the mere product of a preferred choice but are driven by positive other-regarding decisions  
267 resulting in other’s rewards. Finally, we ruled out a possibility that sensory-evoked responses associated  
268 with choosing a target stimulus might underlie the differential, frequency-specific, coordination between  
269 BLA and ACCg. In both beta and gamma frequency bands, the  $BLA_{\text{spike}}-ACCg_{\text{field}}$  and  $ACCg_{\text{spike}}-BLA_{\text{field}}$   
270 coherence patterns were not at all differentially modulated by the onset of a fixation stimulus (**Fig. S9** and  
271 Supplemental Results). Taken together, the current findings support enhanced inter-regional coherence

272 patterns between the two areas associated with expressing positive compared to negative ORP toward a  
 273 conspecific.  
 274

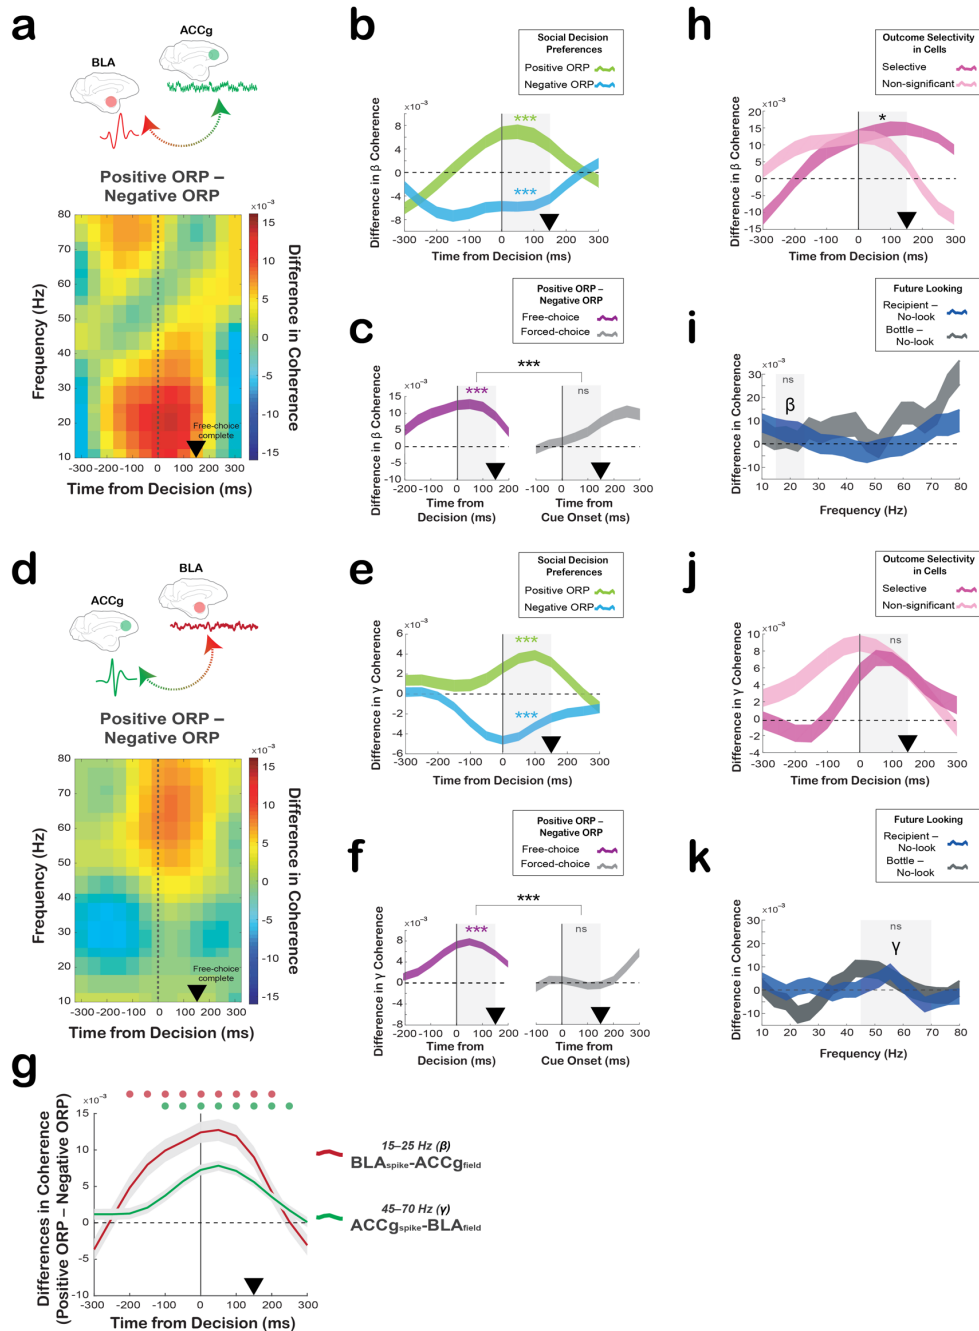

275  
 276 **Fig. 3. Spike-field coherence between ACCg and BLA shows frequency-specific and free-choice-selective**  
 277 **coordination for positive ORP compared to negative ORP. (a) Differences in BLA<sub>spike</sub>-ACC<sub>field</sub> coherence**  
 278 **values between expressing positive ORP (*Other-Bottle*) and negative ORP (*Self-Both*) across time and frequency**

279 aligned to the time of free-choice decision. **(b)** Time courses of the spike-field coherence values in the beta  
280 frequency separately for positive ORP (light green; *Other–Bottle*) and negative ORP (light blue: *Self–Both*). **(c)**  
281 Time courses of the beta spike-field coherence differences between expressing positive ORP and negative ORP on  
282 free-choice trials (purple) and between the forced-choice construct of positive ORP (*Other-forced–Bottle-forced*)  
283 and the forced choice construct of negative ORP (*Self-forced–Both-forced*) on forced-choice trials (grey). **(d)**  
284 Difference in  $ACC_{g_{spike}}-BLA_{field}$  coherence values between expressing positive ORP and negative ORP across time  
285 and frequency. Same format as in a. **(e)** Time courses of the spike-field coherence values in the gamma frequency  
286 separately for positive ORP (light green) and negative ORP (light blue). **(f)** Time courses of the gamma spike-field  
287 coherence differences between positive and negative ORPs on free-choice (purple) trials and between the forced-  
288 choice construct of positive ORP and the forced-choice construct of negative ORP on forced-choice trials (grey). **(g)**  
289 Average time courses of the beta band  $BLA_{spike}-ACC_{g_{field}}$  coherence (red) and the gamma band  $ACC_{g_{spike}}-BLA_{field}$   
290 coherence (green) differences between the two ORPs. Circles above the lines (in matching colors) show significant  
291 differences from zero ( $p < 0.05$ , Wilcoxon sign rank). **(h)** Time courses of the spike-field coherence differences  
292 between the two ORPs on free-choice trials in the beta frequency separately for outcome selective (dark pink) and  
293 non-significant cells (light pink). **(i)** Differences in the  $BLA_{spike}-ACC_{g_{field}}$  coherence values across frequency  
294 between when the monkeys ultimately looked at the conspecific’s face during the inter-trial interval (blue; looking at  
295 the conspecific – no-looking) and when they ultimately looked at a bottle (gray; future looking at the bottle – no-  
296 looking), collapsed across all outcomes. **(j)** Time courses of the gamma band spike-field coherence differences  
297 separately for outcome selective (dark pink) and non-significant cells (light pink) preferences. Same format as **h**. **(k)**  
298 Differences in the  $ACC_{g_{spike}}-BLA_{field}$  coherence values between looking at the conspecific’s face and the bottle in  
299 the future. Same format as **i**. In **b–c**, **e–f**, and **h–k**, significant coherence differences from zero (Wilcoxon sign rank)  
300 are indicated by asterisks in matching colors and significant coherence differences between traces (Wilcoxon rank  
301 sum) are indicated in black asterisks for the analyzed epoch (gray shading) (\*\*\*,  $p < 0.0001$ ; \*\*,  $p < 0.001$ ; \*,  $p <$   
302  $0.01$ ; ns, not significant). In all plots, the black arrowheads mark the time at which the monkeys completed a free-  
303 choice or forced-choice decision by maintaining gaze fixation on a chosen target or cue.

304

305 Crucially, the coordination of spikes and LFP observed between BLA and ACCg was specific to  
306 when the actor monkeys made preference-based decisions (free-choice). From pseudo-randomly  
307 interleaved forced-choice trials in which the computer selected the reward outcomes that were otherwise  
308 identical, we were able to construct spike-field coherence differences with matching reward outcomes in  
309 the absence of decision-making. We contrasted *Other-forced* and *Bottle-forced* trials (forced-choice  
310 construct of positive ORP) for comparing it to positive ORP and contrasted *Self-forced* and *Both-forced*  
311 trials (forced-choice construct of negative ORP) for comparing it to negative ORP. The beta band  
312  $BLA_{spike}-ACC_{g_{field}}$  coherence as well as the gamma band  $ACC_{g_{spike}}-BLA_{field}$  coherence markedly differed

313 between when the monkeys did or did not make active decisions (**Fig. 3c, f, and Fig. S2**). The beta  
314  $BLA_{spike}$ - $ACCg_{field}$  coherence (15–25 Hz), which was selectively enhanced for positive ORP ( $p < 0.0001$ ,  
315 Wilcoxon sign rank), was absent for the forced-choice positive ORP ( $p = 0.17$ ) (difference between free-  
316 choice and forced-choice:  $p < 0.0001$ , Wilcoxon rank sum, **Fig 3c**). Similarly, the gamma  $ACCg_{spike}$ -  
317  $BLA_{field}$  coherence (45–70 Hz), which was again selectively enhanced for positive ORP ( $p < 0.0001$ ), was  
318 absent for forced-choice positive ORP ( $p = 0.62$ ) (difference between free-choice and forced-choice:  $p <$   
319  $0.0001$ ). Therefore, the coordination signatures differentiating positive from negative ORP were unique to  
320 making free-choice decisions and not merely driven by either the visual stimuli or the anticipation of  
321 specific reward outcomes.

322         Given that the  $BLA_{spike}$ - $ACCg_{field}$  coherence differences in the beta band appeared to emerge  
323 earlier and terminate sooner than  $ACCg_{spike}$ - $BLA_{field}$  coherence differences in the gamma band (**Fig. 3**),  
324 we next examined possible disparities in the coherence onset time to help elucidate any potential  
325 functional differences between the two coordination types. The  $BLA_{spike}$ - $ACCg_{field}$  coherence in the beta  
326 band began to significantly differentiate positive from negative ORP earlier ( $p < 0.05$ , Wilcoxon sign  
327 rank) than the  $ACCg_{spike}$ - $BLA_{field}$  coherence in the gamma band (**Fig. 3g**). Additionally, the  $ACCg_{spike}$ -  
328  $BLA_{field}$  coherence in the gamma band continued to significantly differentiate positive from negative ORP  
329 longer compared to  $BLA_{spike}$ - $ACCg_{field}$  coherence in the beta band (**Fig. 3g**). To further investigate the  
330 temporal profiles, we examined the time at which either spiking or LFP activity began to significantly  
331 signal decision outcomes (**Fig. S10**). Spiking activity associated with choosing *Other* emerged earlier in  
332 BLA compared to ACCg ( $p = 0.001$ ; two sample Kolmogorov-Smirnov test). By contrast, there were no  
333 such differences associated with choosing *Self*, *Both*, or *Bottle* outcomes between the two areas (all  $p >$   
334  $0.08$ ) (**Fig. S10a**). Further, we did not observe any temporal differences in LFP power between the two  
335 nodes for both the beta (*Self*, *Both*, *Other*, and *Bottle*, all  $p > 0.38$ ) and the gamma bands (all  $p > 0.62$ )  
336 (**Fig. S10b**). Finally, we tested if there were any anatomical differences in the strength of spike-field  
337 coherence patterns. We found no discernable anatomical gradients for either the beta or gamma spike-  
338 field coherence differences between positive and negative ORPs within ACCg and BLA cells/sites (all

339 comparisons using AP, ML, or Depth dimension separately, or based on principal component analysis, all  
340  $|r| < 0.32$ , all  $p > 0.16$ , Spearman correlation).

341

### 342 **Directionality of information flow between ACCg and BLA for social decisions**

343 Coordination between ACCg and BLA may exhibit a specific directionality of information flow  
344 that may critically differ between expressing the two ORPs. To determine this, we performed a partial  
345 directed coherence (PDC) analysis, a specialized methodology derived from the Granger analytic  
346 principle purposely tailored for analyzing directionality in the frequency-time domain<sup>30</sup>. Without  
347 choosing any frequency bands a priori, we observed systematic differences in directional information  
348 flow between ACCg and BLA as a function of social decision preference as well as frequency band. We  
349 found a significant influence of BLA to ACCg in the beta band (BLA→ACCg) for positive ORP that  
350 began right around the time of decision and continued for the duration of the post-decision epoch (PDC  
351 difference between BLA→ACCg and ACCg→BLA,  $p < 0.0001$ ; Wilcoxon sign rank) (**Fig. 4a, b**). This  
352 increase in directional influence occurred in the same frequency range that exhibited an increase in the  
353 BLA<sub>spike</sub>-ACCg<sub>field</sub> coherence for positive ORP. By contrast, we found the opposite pattern for negative  
354 ORP, with a stronger influence of ACCg to BLA (PDC difference in the beta band between ACCg→BLA  
355 and BLA→ACCg,  $p = 0.002$ ). Similarly, we also found a significant but less pronounced influence of  
356 BLA to ACCg in the gamma band (BLA→ACCg) for positive ORP (PDC difference in the gamma band  
357 between BLA→ACCg and ACCg→BLA,  $p = 0.04$ ) that appeared later than the BLA→ACCg influence  
358 in the beta band (**Fig. 4c**), with a more robust and again opposite influence of ACCg to BLA for negative  
359 ORP (PDC difference between ACCg→BLA and BLA→ACCg,  $< 0.0001$ ). However, while we found  
360 frequency-dependent BLA→ACCg influence for positive ORP in the beta and gamma bands (compared  
361 to ACCg→BLA), the directionality patterns associated with negative ORP were largely frequency-  
362 independent between BLA→ACCg and ACCg→BLA (**Fig. 4a, b**).

363 Finally, we observed similar directionality of information flow in both BLA→ACCg and  
364 ACCg→BLA for free-choice compared to forced-choice trials for both types of ORPs (**Fig. S11**). While

365 we observed a general BLA→ACCg influence in the frequency range encompassing both the beta and  
366 low gamma bands for positive ORP, the directionality patterns associated with forced-choice trials were  
367 much less frequency-dependent compared to the free-choice trials. The directional information flow for  
368 negative ORP showed a strong ACCg→BLA influence (again, opposite to the positive ORP results) for  
369 negative ORP with a longer time span.

370 Together, these findings demonstrate the presence of specific information flow directions  
371 between BLA and ACCg, with a general BLA→ACCg influence for expressing positive ORP and  
372 ACCg→BLA influence for expressing negative ORP, both for free-choice and forced-choice trials.  
373 Moreover, even though the PDC analyses do not use spikes, the BLA→ACCg information flow for  
374 positive ORP was observed in the same beta band that exhibited the enhanced  $BLA_{\text{spike}}-ACCg_{\text{field}}$   
375 coherence for positive compared to negative ORP.

376



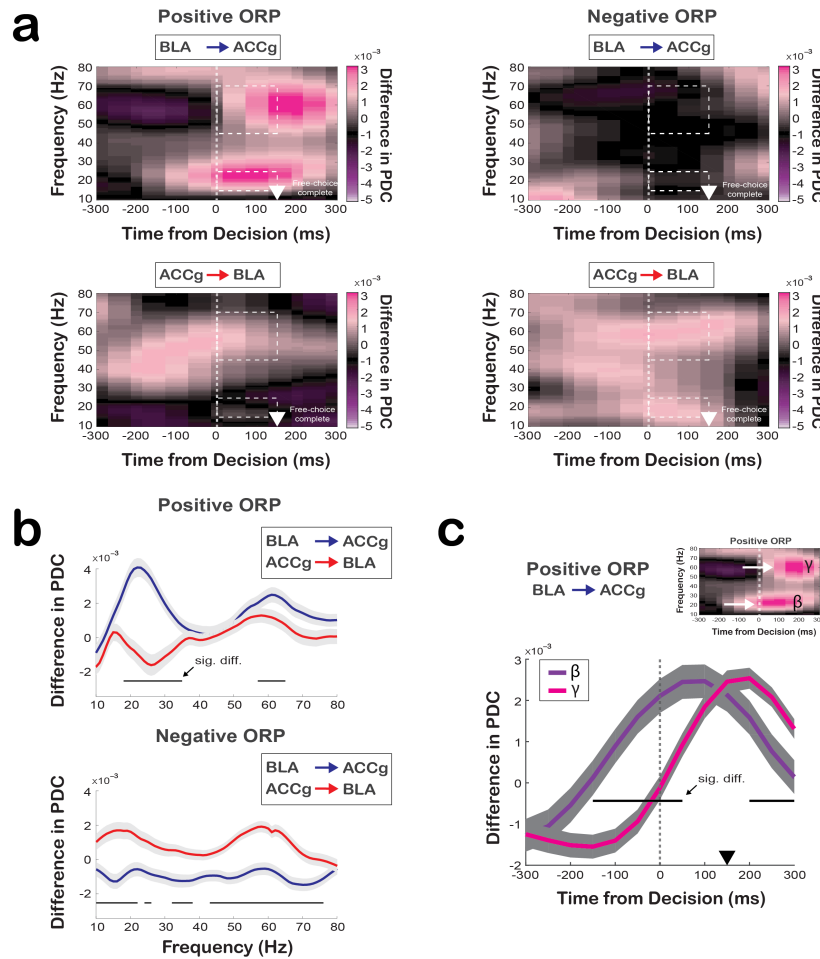

377

378 **Fig. 4. Directionality of information flow between ACCg and BLA for positive ORP and negative ORP as a**  
 379 **function of time and frequency. (a)** Frequency-domain directional influences assessed by partial directed  
 380 coherence (PDC) on free-choice trials. PDC values as a function of time and frequency for positive ORP (*Other-*  
 381 *Bottle*) for BLA→ACCg (top left) and ACCg→BLA (bottom left), and PDC values for negative ORP (*Self-Both*)  
 382 for BLA→ACCg (top right) and ACCg→BLA (bottom right). The white arrowheads mark the time at which the  
 383 monkeys completed a free-choice by maintaining fixation on a chosen target for 150 ms. Dotted lines indicate the  
 384 beta (15–25Hz) and gamma (45–70Hz) band during the post-decision epoch. **(b)** Quantification of the directionality  
 385 of information flow during the free-choice decision epoch as a function of frequency for positive ORP decision (left)  
 386 and negative ORP (right) for BLA→ACCg (in blue) and ACCg→BLA (in red). Horizontal purple lines indicate  
 387 significantly different between PDC values ( $p < 0.05$ , Wilcoxon sign rank). Shaded regions represent standard  
 388 errors. Horizontal lines indicate significant differences between BLA→ACCg and ACCg→BLA ( $p < 0.05$ ,  
 389 Wilcoxon sign rank). **(c)** Time courses of the beta and gamma band PDC differences for BLA→ACCg for positive  
 390 ORP. Horizontal lines indicate significant differences between the beta and gamma band PDC differences ( $p < 0.05$ ,  
 391 Wilcoxon sign rank). Shaded regions represent standard errors.

392

### 393 **Decoding social decisions directly from synchrony between ACCg and BLA**

394 To examine whether neuronal coordination between ACCg and BLA contain decodable  
395 information on monkey's social decisions, we trained a linear decoder to discriminate decision types  
396 directly from observed spike-field coherence values (**Fig. 3**). The classifier was trained using randomly  
397 selected subsets of 75% of trials and later tested on the remaining 25% of trials used as inputs, yielding  
398 estimates of the decision outcome on each trial.

399 The first decoder was trained to distinguish between *Other* and *Bottle* decisions (positive ORP)  
400 from the  $BLA_{spike}-ACCg_{field}$  coherence values in the beta band (15–25 Hz) or from the  $ACCg_{spike}-BLA_{field}$   
401 coherence values in the gamma band (45–70 Hz) across time. Decoding performance from the beta  
402  $BLA_{spike}-ACCg_{field}$  coherence for discriminating *Other* from *Bottle* began to increase prior to the decision  
403 time and peaked around the time of the decision ( $p < 0.0001$ , compared to an empirically-derived null  
404 distribution, Wilcoxon sign rank) (**Fig. 5a**). On the other hand, the decoding accuracy from the gamma  
405  $ACCg_{spike}-BLA_{field}$  coherence for discriminating *Other* from *Bottle* was lower at the time of free-choice  
406 decision but gradually improved during the post-decision epoch as monkeys fixated on a chosen option to  
407 complete the decision (**Fig. 5b**). The second decoder was trained to distinguish between *Self* and *Both* for  
408 classifying negative ORP in the identical frequency bands and times. Compared to the first decoder, the  
409 decoding performance was overall lower (positive vs. negative ORP in the post-decision epoch:  $p <$   
410  $0.0001$  and  $p < 0.0001$  for decoding from the  $BLA_{spike}-ACCg_{field}$  and  $ACCg_{spike}-BLA_{field}$  coherence,  
411 respectively) and did not show clear time-locked increases around the time of free-choice decision, albeit  
412 still being able to decode above its empirically-derived chance level (**Fig. 5a, b**). In order to establish  
413 whether improved decoding performance for positive ORP might emerge earlier in  $BLA_{spike}-ACCg_{field}$   
414 compared to  $ACCg_{spike}-BLA_{field}$  coherence patterns, we divided the analysis window into the first and  
415 second halves of the post-decision epoch and directly compared decoder performance between the two  
416 ORPs in each period (beta  $BLA_{spike}-ACCg_{field}$  vs. gamma  $ACCg_{spike}-BLA_{field}$ ). Consistent with this  
417 hypothesis, decoding performance was significantly greater for the  $BLA_{spike}-ACCg_{field}$  in the beta band  
418 compared to the  $ACCg_{spike}-BLA_{field}$  coherence in the gamma band in the earlier phase ( $p < 0.0001$ ),

419 whereas this relationship was reversed in the later phase of the epoch, such that relative decoding  
 420 performance for the ACCg<sub>spike</sub>-BLA<sub>field</sub> in the gamma band was significantly greater than the BLA<sub>spike</sub>-  
 421 ACCg<sub>field</sub> coherence in the beta band ( $p < 0.0001$ ) (**Fig. 5c**). These temporal differences in decoding  
 422 accuracy were consistent with the temporal differences observed between the beta BLA<sub>spike</sub>-ACCg<sub>field</sub> and  
 423 the gamma ACCg<sub>spike</sub>-BLA<sub>field</sub> coherence differences in favor of positive ORP. Overall, although the  
 424 extent of decoding accuracy for predicting monkey's social decisions was low even at the peak accuracy  
 425 level, decoding directly from the synchrony signatures was nevertheless reliable.

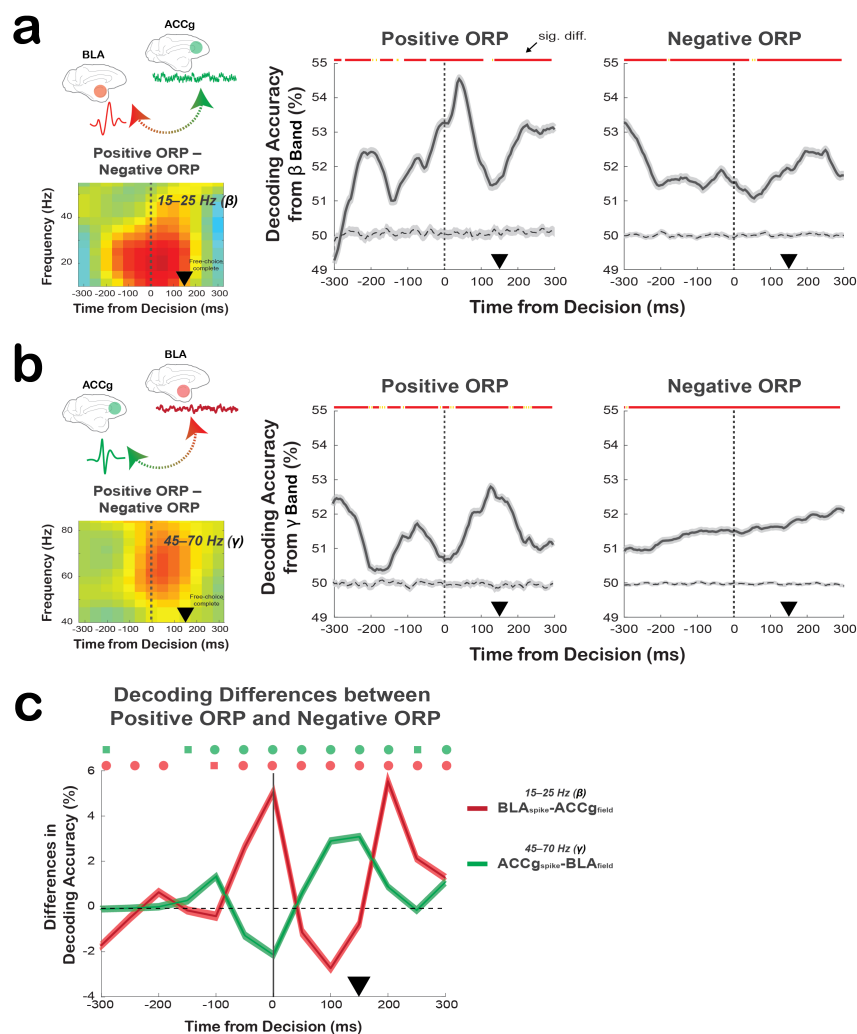

426

427 **Fig. 5. Decoding social decisions directly from the spike-field relations between ACCg and BLA.** (a) Decoding  
 428 performance using the BLA<sub>spike</sub>-ACCg<sub>field</sub> coherence differences in the beta band (shown in the left inset) for  
 429 discriminating *Other* from *Bottle* (middle) and discriminating *Self* from *Both* (right) decisions over time (mean  $\pm$   
 430 s.e.m.). Dashed lines represent empirically determined null distribution. (b) Average decoding performance using

431 the ACC<sub>spike</sub>-BLA<sub>field</sub> coherence in the gamma band (shown in the left inset) for discriminating *Other* from *Bottle*  
432 (middle) and discriminating *Self* from *Both* (right) decisions over time. Same format as in **a**. In **a** and **b** lines indicate  
433 significant differences from the null in each of the 5 ms bin (red:  $p < 0.0001$ , yellow:  $p < 0.05$ , Wilcoxon sign rank).  
434 (c) Differences in decoding performances between *Other/Bottle* and *Self/Both* contexts from the beta BLA<sub>spike</sub>-  
435 ACC<sub>gfield</sub> coherence (red) and the gamma ACC<sub>spike</sub>-BLA<sub>field</sub> coherence (green). Symbols above the lines (in  
436 matching colors) show significant differences from zero (circles:  $p < 0.0001$ , square,  $p < 0.05$ ; Wilcoxon sign rank).  
437 In all plots, the black arrowheads mark the time at which the monkeys completed a free-choice decision by  
438 maintaining fixation on a chosen target for 150 ms.

439

## 440 Discussion

441 Coordination through oscillatory mechanisms has been theorized to provide a unique temporal  
442 window for neuron-to-neuron synchrony<sup>31-33</sup>. Growing evidence supports that oscillatory coordination  
443 across different brain regions is one mechanism used to regulate a wide range of cognitive functions, from  
444 visual perception<sup>34,35</sup>, motor planning<sup>36</sup>, and spatial navigation<sup>37</sup> to higher-order functions underlying  
445 working memory<sup>38</sup>, associative learning and decision-making<sup>39-42</sup>. A number of studies have also  
446 emphasized the importance of cortical-subcortical interactions in facilitating complex cognitive  
447 operations<sup>20,21,24,40-42</sup>. The frequency-specific and direction-selective coordination between BLA and  
448 ACCg reported here exemplifies one possible medial prefrontal-amygdala coordination mechanism by  
449 which two nodes in the social brain network interact during complex social behaviors.

450 The coherence patterns between ACCg and BLA were predominantly characterized by enhanced  
451 coherence for positive ORP but suppressed coherence for negative ORP (**Fig. 3**). Thus, enhanced co-  
452 engagements of ACCg and BLA may promote the expression of positive ORP, whereas co-  
453 disengagements of ACCg and BLA in turn may lead to the expression of negative ORP. Notably, the  
454 coordination patterns exhibited specializations in the frequency domain. Our results suggest that the beta  
455 band may be involved in linking spiking outputs from BLA cells with the synaptic input or dendritic  
456 integration of ACCg cells, whereas the gamma band may be involved in the interaction linking these  
457 processes in reverse. Frequency-specific coordination between ACCg and BLA may provide separate  
458 synchrony “streams” that could be useful in mediating processes related to social decision preference.

459 Such specializations of frequency channels underlying different cognitive operations have also been  
460 observed in the past for cortico-cortical interactions involving top-down and bottom-up visual attention<sup>43</sup>.

461 In general, synchrony found in lower frequency range is thought to be more robust to temporal  
462 dynamics of spiking activity due to slower temporal profiles<sup>44</sup>, perhaps making lower frequency channels  
463 better for synchronizing distant structures. Further, the beta frequency in particular has been theorized to  
464 mediate ‘the status quo’ functions associated with maintaining predicted or internally-consistent  
465 behaviors<sup>45</sup>. The use of a beta frequency channel for linking BLA spikes to ACCg field may be one  
466 mechanism for facilitating robust and long-range coordination between BLA and ACCg for positive ORP.  
467 On the other hand, synchrony found in higher frequency range is likely be strongly driven by local  
468 computations, requiring fast-spiking GABA-ergic inhibitory interneurons<sup>44,46</sup>. The gamma frequency  
469 range especially has been associated with generating selective representations of certain stimuli over  
470 others<sup>47</sup>. The use of a gamma frequency channel for linking ACCg spikes to BLA field may be reflective  
471 of further interactions based on local computations in ACCg following the long-range synchrony initiated  
472 through the beta frequency.

473 Importantly, the directionality of information flow between the two regions was largely selective  
474 for positive ORP, with the predominant directional influence from BLA to ACCg in the beta frequency  
475 channel greater for positive compared to negative ORP. This directionality occurred in the same  
476 frequency band that exhibited enhanced coordination between BLA spikes and ACCg field for positive  
477 ORP. Moreover, the BLA<sub>spike</sub>-ACCg<sub>field</sub> coordination associated with positive ORP was amplified for the  
478 outcome selective BLA cells. Taking these results together with earlier emergence of the BLA<sub>spike</sub>-  
479 ACCg<sub>field</sub> compared to the ACCg<sub>spike</sub>-BLA<sub>field</sub> coordination, spiking activity from BLA cells that  
480 differentiate social decision outcomes may drive ACCg for processing positive ORP. BLA cells are well-  
481 known for signaling social contextual information, such as distinct social gaze orientations and facial  
482 expressions<sup>48,49</sup>, that powerfully shapes social behaviors. Future work can test if and when BLA cells with  
483 other specialized functions transmit such information to rostral ACCg or other medial prefrontal cortical  
484 areas to bias social decisions across various social contexts.

485           Interestingly, the coordination between ACCg and BLA was largely specific to free-choice or  
486 active decisions, compared to trials on which the computer made the decisions for the actors. This finding  
487 argues that the coordination between these areas was not driven by anticipation of upcoming reward  
488 outcomes, but rather by voluntarily expressing one's social decision preferences. Although it is inherently  
489 difficult to entirely rule out the possibility that these circuits are simply less engaged by virtue of not  
490 making active decisions on forced-choice trials, freely expressing social preference may engage the  
491 medial prefrontal-amygdala circuit in unique ways. This hypothesis is also supported by two previous  
492 observations in the primate BLA demonstrating specialized neural codes for computing free-choice,  
493 compared to forced-choice, decisions<sup>9,50</sup>.

494           In social decision-making scenarios like the one abstracted by our task, it is imperative for a  
495 decision-maker to be aware of a chosen option and an ultimate actualization of the corresponding reward  
496 outcome for either self or other. In the reinforcement learning theory, post-decision or 'afterstate' signals  
497 available during post-decisional monitoring can serve as an important and unique feedback mechanism  
498 for more efficient learning of actions and reward outcomes<sup>59</sup>. We hypothesize that the specialized  
499 coordination of BLA and ACCg prioritizing positive ORP during the post-decision state may indicate that  
500 the two regions coordinate to synchronize post-decision processing for efficiently linking across action,  
501 chosen value, and the ultimate reward outcome of another individual. However, future work with a  
502 specific behavioral design for modulating the fidelity of post-decision monitoring in relation to BLA-  
503 ACCg coupling is necessary to more directly test this hypothesis.

504           Finally, it is worth pointing out some limitations of the current work. Although the task had an  
505 embedded condition for delivering juice to a non-social entity (bottle), it remains unknown whether  
506 similar coherence patterns would be present when expressing a preference in a completely non-social  
507 context. Future work should examine how the reported spike-field coherence patterns between BLA and  
508 ACCg might be differentially modulated by expressing decision preferences in social and non-social  
509 contexts. Moreover, despite the fact that we removed any self-reward contingency within the two  
510 independent decision-making contexts (*Self-Both* from *Self/Both* context and *Other-Bottle* from

511 *Other/Bottle* context), it is worthwhile to acknowledge that the two contexts were clearly different and  
512 deriving positive ORP from *Other/Bottle* context and negative ORP from *Self/Both* context might have  
513 influenced our findings. However, the fact that we observed overwhelmingly similar spike-field as well as  
514 field-field coherence patterns upon deriving positive ORP from the *Self/Both* context (*Both–Self*) and  
515 negative ORP from the *Other/Bottle* context (*Bottle–Other*) greatly mitigates this concern.

516 Overall, the current findings support the view that BLA and ACCg neurons utilize distinct  
517 frequency channels and direction-selective coordination in social decision-making. Efficient and perhaps  
518 even strategic coordination occurring between medial prefrontal regions and the amygdala that prioritizes  
519 positive ORP over negative ORP may play an essential role in promoting mutually beneficial social  
520 cohesion. In turn, failures in synchronized transmissions along the medial prefrontal-amygdala network  
521 may bias other relevant brain networks to converge toward producing atypical social behaviors.

522

523 **Data Availability**

524 Behavioral and neural data presented in this paper and the main analysis codes will be available through  
525 <https://github.com/changlabneuro> upon acceptance of the manuscript.

526

527 **Acknowledgements**

528 We are extremely grateful to Bijan Pesaran for his guidance on examining oscillatory neural processes  
529 throughout the duration of this research. We especially thank Daeyeol Lee and Alex Kwan for their  
530 thoughtful discussions and suggestions on improving this work. We also thank Amrita Nair and Siqi Fan  
531 for insightful comments on the manuscript. This work was supported by the National Institute of Mental  
532 Health (R01MH110750; R01MH120081; R21MH107853; R00MH099093), Alfred P. Sloan Foundation  
533 (FG-2015-66028), and the Teresa Seessel Postdoctoral Fellowship.

534

535 **Author Contributions**

536 S.W.C.C. and O.D.M. designed the study and wrote the paper. O.D.M. performed the experiments.  
537 C.J.C., N.A.F., O.D.M., and S.W.C.C. analyzed the data.

538

539 **Competing Financial Interests**

540 The authors declare no competing financial interests.

541



## 542 **Online Methods**

### 543 **Animals**

544 Two adult male rhesus macaques (*Macaca mulatta*) were involved in the study as actors  
545 (monkeys K and H; ages, both 6; weights, 7 and 8 kg), and two adult female monkeys (ages, 6 and 10;  
546 weights, 9 and 10 kg) were involved only as recipients in the social reward allocation task. All animals  
547 were unrelated and not cagemates. Actors were housed in a colony room with other male macaques,  
548 whereas two female macaques resided in an adjacent colony room with other females. All four subjects  
549 were housed in pairs with other animals from the colony, kept on a 12-hr light/dark cycle, had  
550 unrestricted access to food, and controlled access to fluid during testing. All procedures were approved by  
551 the Yale Institutional Animal Care and Use Committee and in compliance with the National Institutes of  
552 Health Guide for the Care and Use of Laboratory Animals.

553

### 554 **Surgery and anatomical localization**

555 All four animals received a surgically implanted headpost (Grey Matter Research) for restraining  
556 their head during the experiments. Subsequently, a second surgery was performed on actor monkeys to  
557 implant a recording chamber (Crist) to provide access to ACCg and BLA. Placement of the chambers  
558 were guided by both structural magnetic resonance imaging (MRI, 3T Siemens) scan and stereotaxical  
559 coordinates. Prior to starting the recording experiments, we performed a manganese (Mn)-enhanced  
560 magnetic resonance imaging (MEMRI) session for each actor monkey to precisely localize our recording  
561 sites in both ACCg and BLA. For MEMRI, we focally infused 2  $\mu$ l of 19.8  $\mu$ g/ $\mu$ l of Mn (manganese (II)  
562 chloride) in saline solution in both areas using modified Hamilton syringes that traveled along the  
563 identical trajectory as our electrodes. We then performed a structural MRI scan 3 hours after the infusion  
564 to visualize a bright halo to confirm anatomical locations<sup>51</sup>. All electrophysiological recordings were  
565 carried out simultaneously from ACCg (Brodmann areas 24a, 24b, and 32)<sup>29</sup> and BLA<sup>29</sup> (**Fig. 2**).

566

567 **Social reward allocation task**

568 Two monkeys (an actor and a recipient) sat in primate chairs (Precision Engineering, Inc.) at 100  
569 cm from one another at a 90° angle (**Fig. 1a**). Each monkey had his own monitor, which displayed  
570 identical visual stimuli. Both monkeys had their own juice tubes from which juice drops were delivered  
571 via solenoid valves. A third juice tube with its own dedicated solenoid valve delivered juice rewards into  
572 an empty bottle (*Bottle*), which was placed on the opposite side of the recipient (**Fig. 1a**). To prevent  
573 monkeys from forming secondary associations of solenoid clicks, the three solenoid valves were placed in  
574 another room and white noise was played in the background during all experimental sessions. An infrared  
575 eye-tracking camera (EyeLink 1000, SR Research) continuously recorded the horizontal and vertical eye  
576 positions from actor monkeys.

577 An actor began a trial by fixating on a central square for 150 ms with gaze. The reward value at  
578 stake on each trial was specified by a magnitude cue displayed as a vertical bar indicating juice volume  
579 (0.2, 0.4, or 0.6 ml). The actor was required to maintain gaze fixation on the magnitude cue for 400 ms.  
580 Following a variable delay (200, 400, or 600 ms), the actor was presented with either a free-choice (75%)  
581 or a forced-choice (25%) trial. On free-choice trials, two visual targets appeared at two random peripheral  
582 locations on opposite sides of the screen. The actor had 2 sec to make a choice by shifting gaze to a target  
583 and maintaining the fixation on the target for additional 150 ms in order to complete a choice (i.e., any  
584 break in gaze fixation resulted in an incomplete trial with no further progression into the trial). These  
585 choice targets were always presented in two distinct contexts presented pseudo-randomly. In the *Self/Both*  
586 context (50% of free-choice trials), the actor made decisions to deliver a juice drop to himself (*Self*) or  
587 both himself and the recipient monkey (*Both*; the same amount was delivered at the same time to both  
588 monkeys). By contrast, in the *Other/Bottle* context (50% of free-choice trials), the actor made decisions to  
589 deliver a juice drop to the recipient monkey (*Other*) or to the empty juice collection bottle (*Bottle*).  
590 Critically, any choice made in the two contexts were ‘reward-matched’ from actor’s perspective such that  
591 the actor always received a reward in the *Self/Both* context but never received a reward in the  
592 *Other/Bottle* context. After a following variable delay from completing the decision (200, 400, 600, or

593 800 ms), a juice reward corresponding to the chosen target was delivered to himself (*Self*), to the recipient  
594 (*Other*), to both monkeys (*Both*), or to the bottle (*Bottle*). On forced-choice trials, only a single central  
595 cue was presented on the screen, and the actor had to simply maintain the fixation for 150 ms to complete  
596 the forced-choice decision (i.e., any break in fixation resulted in an incomplete trial with no further  
597 progression into the trial). These computer-determined reward outcomes occurred with equal frequency,  
598 pseudorandomly ordered. After a following variable delay (200, 400, 600, or 800 ms), a juice reward  
599 corresponding to the central cue was delivered to himself (*Self-forced*), to the recipient (*Other-forced*), to  
600 both monkeys (*Both-forced*), or to the bottle (*Bottle-forced*). For both free-choice and forced-choice trials,  
601 reward delivery was followed by a 2.5 sec inter-trial interval, during which the actor was free to look at  
602 the recipient or any other locations in the setup. A trial was considered incomplete if the actor failed to  
603 choose a target or maintain the required 150 ms fixation on free-choice trials or to maintain the required  
604 150 ms fixation on the cue on forced-choice trials. The incomplete trials were not included in the  
605 analyses.

606

## 607 **Electrophysiology**

608 LFP and spiking activity was recorded using 16-channel axial array electrodes (U- or V-Probes,  
609 Plexon) or single tungsten electrodes (FHC Instruments) placed in each of the recording regions using a  
610 32-channel system (Plexon). At the beginning of each session, a guide tube was used to penetrate the  
611 intact dura and to guide electrodes, which were lowered using a motorized multi-electrode microdrive  
612 system (NaN Instruments) with a speed of 0.02 mm/sec. After the electrodes reached the target sites in  
613 both ACCg and BLA, we waited 30 min for the tissue to settle before starting each recording session to  
614 ensure signal stability. Because some of the data were obtained using two 16-channel electrode arrays,  
615 one in ACCg and the other in BLA (20% of the total recording sessions), we randomly assigned 16  
616 uniquely paired LFP sites across the two regions, using a random number generator, to remove redundant  
617 inflations of correlation for the relevant data.

618

## 619 **Data Analysis**

### 620 **Behavioral analyses**

621 We constructed a choice preference index as contrast ratios<sup>6,27,28,52</sup> (Eq. 1).

$$622 \quad \textit{Preference Index} = \frac{R_a - R_b}{R_a + R_b} \quad (\text{Eq. 1})$$

623  $R_a$  and  $R_b$  were the frequency of particular choices. For the *Self/Both* context,  $R_a$  and  $R_b$  were  
624 numbers of *Both* and *Self* choices, respectively. For the *Other/Bottle* context,  $R_a$  and  $R_b$  were numbers of  
625 *Other* and *Bottle* choices, respectively. An index of 1 thus corresponds to always choosing a positive ORP  
626 outcome,  $-1$  corresponds to always choosing a negative ORP outcome, and 0 indicates indifference. We  
627 additionally performed a regression analysis to quantify changes over time in their behavioral preferences  
628 for both *Self/Both* and *Other/Bottle* context in each session.

629 Looking frequency was computed based on the average number of gaze shifts landing on the face  
630 of the recipient monkey (the face region of the recipient was empirically mapped and fitted with a  
631 rectangle window) or the bottle (mapped empirically with the same-dimensioned window as the face  
632 region) during the 2.5 sec inter-trial interval<sup>6,27,28,52</sup>. Decision reaction time, the time from the onset of two  
633 targets on free-choice trials to eye movement onset, were computed using a  $20^\circ \text{ sec}^{-1}$  velocity  
634 criterion<sup>6,27,28,52</sup>.

635

### 636 **Spiking and LFP activity**

637 Broadband analog signals were amplified, band-pass filtered (250 Hz–8 kHz), and digitized (40 kHz)  
638 using a Plexon OmniPlex system. Spiking data were saved for waveform verifications offline and  
639 automatically sorted using the MountainSort algorithm<sup>53</sup>. LFP data were analyzed using custom  
640 MATLAB scripts (The MathWorks) and the Chronux signal processing toolbox<sup>54</sup>. Continuous LFP  
641 signals from each recording electrode in each area were segmented into 1-sec periods centered on  
642 acquiring (i.e. saccade offset) the choice target or acquiring the central cue at a sample rate of 1 kHz. Raw  
643 signals were then band-passed filtered from 2.5 Hz to 250 Hz. We chose a zero-phase filter to avoid

644 introducing phase-distortions to the signals. Signals were normalized by subtracting a reference voltage  
645 trace recorded from an independent reference electrode placed in the subdural space in order to eliminate  
646 the common noise from each electrode. Three primary epochs were used to carry out neural data analyses:  
647 during the 150 ms window during the first fixation period required to begin each trial (baseline epoch);  
648 during the 150 ms period from the time of acquiring (i.e. saccade offset) a choice target on free-choice  
649 trials (post-decision epoch) and also during the 150 ms period after the central cue onset on forced-choice  
650 trials (cue epoch). To determine outcome selective cells from each region, we performed one-way  
651 ANOVA with outcome as the factor (*Self, Both, Other, Bottle*) using the spiking activity from either the  
652 post-decision epoch or reward epoch (50–450 ms from reward onset). Finally, to compare the emergence  
653 times of outcome selective signals in both spiking and LFP activity, we calculated the cumulative  
654 distributions of the times at which each cell or LFP site exhibited significant encoding of different  
655 outcomes around the time of decision-making, relative to the baseline epoch ( $p < 0.05$ , Wilcoxon sign  
656 rank).

657

### 658 **Spike-field coherence and field-field coherence**

659 We quantified spike-field coherence level by examining the phase differences between LFP and  
660 spike signals. We designated one area as the “spike contributor” and the other area as the “field  
661 contributor”. Spike-field coherence was calculated from two directions, either ACCg or BLA as the spike  
662 contributor and the other area in the pair as the field contributor. We first binned spikes and LFP using  
663 sliding time windows of 150 ms, in steps of 50 ms, for a 1 sec interval centered on the time of decision on  
664 free-choice trials or the cue onset on forced-choice trials. Fourier estimates were then computed by means  
665 of a multi-taper transformation applied to single trial data; we selected a time half-bandwidth product of  
666 2, and multiplied the raw signals by 3 Slepian (orthogonal) tapers<sup>55</sup>. With a 1 kHz sampling rate, this  
667 yielded a frequency resolution of  $\sim 3.096$  Hz. Spectral density estimates were additionally restricted to the  
668 10–80 Hz interval, considering the Nyquist limit. The spectrum density of point process (spikes) was  
669 transformed by applying fast Fourier transform on the discrete data. Coherence was then calculated

670 between two spectrum densities of continuous process (LFP) and point process (spikes) by computing the  
671 cross-spectral density of the two processes ( $x$  and  $y$ ;  $P_{xy}$ ) with respect to frequency ( $f$ ), which was  
672 normalized by the product of the power spectral densities of each process ( $P_{xx}$  and  $P_{yy}$ ) as a function of  
673 frequency (Eq. 2).

$$674 \quad \text{Coherence} = \frac{|P_{xy}(f)|^2}{P_{xx}(f)P_{yy}(f)} \quad (\text{Eq. 2})$$

675 Raw coherence values therefore ranged from 0 to 1, where a perfectly constant phase relationship  
676 between the two regions would be indicated by a coherence value of 1 while an absence of any phase  
677 relationship would be indicated by a value of 0. We contrasted coherence values between different  
678 conditions and obtained average across pairs of cells and LFP sites. A linear regression was used to  
679 quantify the changes in  $\text{BLA}_{\text{spike}}\text{-ACC}_{\text{gfield}}$  coherence and  $\text{ACC}_{\text{gspike}}\text{-BLA}_{\text{field}}$  coherence patterns for both  
680 the beta and gamma band over time within each session.

681 For calculating within-region spike-field coherence, we used the same approach described above  
682 for between-region spike-field coherence but excluded relating spikes and LFPs originating from the  
683 same electrode channels. For looking at the relationships of LFPs across the two regions, field-field  
684 coherence was computed in the same format as in the spike-field coherence described above except the  
685 following. Field-field coherence was calculated between two spectrum densities of continuous processes  
686 (LFPs from each region) by computing the cross-spectral density of the two processes ( $x$  and  $y$ ;  $P_{xy}$ ) with  
687 respect to frequency ( $f$ ), which was normalized by the product of the power spectral densities of LFP  
688 processes from each region ( $P_{xx}$  and  $P_{yy}$ ) with respect to frequency (same format as in Eq. 2).

689

### 690 **Directionality of information flow**

691 We calculated partial directed coherence (PDC), which is based on multivariate autoregressive  
692 (MVAR) model and is well suited for describing directionality of information flow between  
693 simultaneously recorded time series in the frequency domain<sup>30</sup>. We contrasted time-varying PDC as  
694 (*Other*) – (*Bottle*) and (*Self*) – (*Both*) for free-choice trials, as well as (*Other-forced*) – (*Bottle-forced*) and

695 (*Self-forced*) – (*Both-forced*) for forced-choice trials. As we did for the coherence analyses, we restricted  
 696 the combinations of pairs to be unique across sites. For example, for the data recorded from a 16-channel  
 697 array placed in each of the two areas, we randomly selected 16 unique pairs out of 16 x 16 pairs to avoid  
 698 redundancy and undesired inflation in correlations. For each pairwise LFP signals, the parameters of  
 699 multivariate autoregressive model (MVAR) of order  $r$  was formulated as:

$$700 \quad A_r = \begin{bmatrix} a_{ii}^r & a_{ij}^r \\ a_{ji}^r & a_{jj}^r \end{bmatrix} \quad (\text{Eq. 3})$$

701 where parameter  $a$  reflects linear relationship between channel  $i$  and  $j$  at delay  $r$ . While  $r = 1 \dots p$   
 702 represents the order of the model. To obtain PDC measures across time, instead of applying adaptive  
 703 filtering method to estimate time-varying autoregressive coefficient, we calculated PDC values based on  
 704 sliding window of 150 ms with a 50 ms step size just as we do for the coherence measures. Model order  
 705 of MVAR model was estimated by using the post-decision epoch data to minimize Schwarz Bayesian  
 706 information criteria (SBC) across all LFP pairs. This resulted in  $p = 12$ , specifying that the current value  
 707 is predicted by immediately preceding twelve values in the series. The model extended to the frequency  
 708 dimension was defined as:

$$709 \quad A(f) = I - \sum_{r=1}^p A_r Z^{-r} \Big|_{z=e^{j2\pi f}} \quad (\text{Eq. 4})$$

710 where  $I$  is the identity matrix and  $f$  ranges within 0 to Nyquist frequency. PDC values were then defined  
 711 by taking the absolute value of  $A(f)$  and normalizing by its column vector (see equation 18 in reference  
 712 30). To reduce the co-variability of signal between channels due to common sources, we adapted the  
 713 extended version of classical PDC<sup>57</sup>. The new generalized orthogonalized measure of PDC ( $\tilde{\psi}$ ) as a  
 714 function of time and frequency was defined as:

$$715 \quad \tilde{\psi}_{ij}(f) = \frac{1}{\lambda_{kk}^2} \frac{|Real\{A_{ij}(f)\}|}{\sqrt{a_j^H(f)\Sigma_w^{-1}a_j(f)}} \cdot \frac{|Imag\{A_{ij}(f)\}|}{\sqrt{a_j^H(f)\Sigma_w^{-1}a_j(f)}}, \quad i \neq j \quad (\text{Eq. 5})$$

716 where  $a_j$  is the  $j$ 's column vector and  $A_{ij}$  is the  $ij$ th element of  $A(f)$ .  $H$  denotes the Hamilton transpose  
 717 of the vector  $a$ .  $\Sigma_w$  is the diagonal covariance matrix from MVAR noise covariance matrix  $w$ , where  $\lambda_{kk}$   
 718 is a diagonal element of  $\Sigma_w$ . For one pair of channels, ( $\tilde{\psi}$ ) was shown in a 2 x 2 matrix, where non-

719 diagonal elements represent directional interaction between channel  $i$  and  $j$ , that is, ACCg→BLA or  
720 BLA→ACCg. We then calculated and averaged ( $\tilde{\psi}$ ) across all trials in each condition (*Self*, *Both*, *Other*,  
721 or *Bottle*) and averaged pairwise sites of PDC across all recording sessions. For testing whether specific  
722 frequency bands exhibit significantly different PDC values between conditions for each ACCg→BLA and  
723 BLA→ACCg, we compared PDC values from the same time window used for the main spike-field  
724 coherence results.

725

### 726 **Linear Discriminant analysis (LDA)**

727 To test the decodability of social decisions directly from spike-field coherence values, we used a  
728 standard linear classifier for population decoding<sup>58</sup>. The analysis was run separately for each time-  
729 frequency bin (150 ms bin with 5 ms steps) and for each decision context. For a given time-frequency bin  
730 and context, the trial-level vector of spike-field coherence values in that bin was extracted, along with the  
731 corresponding vector of decision outcomes for each trial. This outcome vector contained *Other* and *Bottle*  
732 labels or *Self* and *Both* labels, depending on the decision context. The decoder was therefore trained to  
733 discriminate between binary outcomes on the basis of spike-field coherence values. In the training phase,  
734 75% of trials were selected at random to train the classifier model. In the testing phase, coherence values  
735 for the remaining 25% of trials were used as inputs, yielding estimates of the decision outcome on each  
736 trial.

737 Decoder performance was assessed as the percentage of test-phase trials that were correctly  
738 labeled. The statistical significance of the performance was assessed with a permutation test. For each of  
739 100 iterations, a null value of the decoder's performance was obtained by shuffling the decision outcome  
740 labels before training and testing. The analysis thus produced arrays of matching sizes representing the  
741 real and null decoding performance for each (time, frequency, condition, iteration) sequence. Decoding  
742 was considered significant if the average performance was higher than the corresponding null  
743 performance at least 99% of the time ( $p < 0.01$ , FDR-corrected for multiple comparisons across  
744 frequencies).



## 745 **References**

- 746 1. Behrens, T. E. J., Hunt, L. T. & Rushworth, M. F. S. The computation of social behavior. *Science*  
747 **324**, 1160–1164 (2009).
- 748 2. Bhanji, J. P. & Delgado, M. R. The social brain and reward: social information processing in the  
749 human striatum. *Wiley Interdiscip. Rev. Cogn. Sci.* **5**, 61–73 (2014).
- 750 3. Sliwa, J. & Freiwald, W. A. A dedicated network for social interaction processing in the primate  
751 brain. *Science* **356**, 745–749 (2017).
- 752 4. Ruff, C. C. & Fehr, E. The neurobiology of rewards and values in social decision making. *Nat. Rev.*  
753 *Neurosci.* **15**, 549–562 (2014).
- 754 5. Seo, H. & Lee, D. Neural basis of learning and preference during social decision-making. *Curr. Opin.*  
755 *Neurobiol.* **22**, 990–995 (2012).
- 756 6. Chang, S. W. C., Gariépy, J.-F. & Platt, M. L. Neuronal reference frames for social decisions in  
757 primate frontal cortex. *Nat. Neurosci.* **16**, 243–250 (2013).
- 758 7. Haroush, K. & Williams, Z. M. Neuronal prediction of opponent’s behavior during cooperative social  
759 interchange in primates. *Cell* **160**, 1233–1245 (2015).
- 760 8. Noritake, A., Ninomiya, T. & Isoda, M. Social reward monitoring and valuation in the macaque  
761 brain. *Nat. Neurosci.* **21**, 1452–1462 (2018).
- 762 9. Chang, S. W. C. *et al.* Neural mechanisms of social decision-making in the primate amygdala. *Proc.*  
763 *Natl. Acad. Sci.* **112**, 16012–16017 (2015).
- 764 10. Grabenhorst, F., Báez-Mendoza, R., Genest, W., Deco, G. & Schultz, W. Primate Amygdala neurons  
765 simulate decision processes of social partners. *Cell* **177**, 986-998.e15 (2019).
- 766 11. Munuera, J., Rigotti, M. & Salzman, C. D. Shared neural coding for social hierarchy and reward  
767 value in primate amygdala. *Nat. Neurosci.* **21**, 415–423 (2018).
- 768 12. Azzi, J. C. B., Sirigu, A. & Duhamel, J.-R. Modulation of value representation by social context in  
769 the primate orbitofrontal cortex. *Proc. Natl. Acad. Sci.* **109**, 2126–2131 (2012).

- 770 13. Baez-Mendoza, R., Harris, C. J. & Schultz, W. Activity of striatal neurons reflects social action and  
771 own reward. *Proc. Natl. Acad. Sci.* **110**, 16634–16639 (2013).
- 772 14. Falcone, R., Brunamonti, E., Ferraina, S. & Genovesio, A. Neural encoding of self and another  
773 agent’s goal in the primate prefrontal cortex: human-monkey interactions. *Cereb. Cortex* **26**, 4613–  
774 4622 (2016).
- 775 15. Nummela, S. U., Jovanovic, V., Mothe, L. de la & Miller, C. T. Social Context-dependent activity in  
776 marmoset frontal cortex populations during natural conversations. *J. Neurosci.* **37**, 7036–7047  
777 (2017).
- 778 16. Apps, M. A. J., Rushworth, M. F. S. & Chang, S. W. C. The anterior cingulate gyrus and social  
779 cognition: tracking the motivation of others. *Neuron* **90**, 692–707 (2016).
- 780 17. Hill, M. R., Boorman, E. D. & Fried, I. Observational learning computations in neurons of the human  
781 anterior cingulate cortex. *Nat. Commun.* **7**, 12722 (2016).
- 782 18. Zaki, J. & Ochsner, K. The neuroscience of empathy: progress, pitfalls and promise. *Nat. Neurosci.*  
783 **15**, 675–680 (2012).
- 784 19. Mars, R. B. *et al.* On the relationship between the “default mode network” and the “social brain”.  
785 *Front. Hum. Neurosci.* **6**, (2012).
- 786 20. Amadei, E. A. *et al.* Dynamic corticostriatal activity biases social bonding in monogamous female  
787 prairie voles. *Nature* **546**, 297–301 (2017).
- 788 21. Allsop, S. A. *et al.* Corticoamygdala transfer of socially derived information gates observational  
789 learning. *Cell* **173**, 1329-1342.e18 (2018).
- 790 22. Zhan, Y. *et al.* Deficient neuron-microglia signaling results in impaired functional brain connectivity  
791 and social behavior. *Nat. Neurosci.* **17**, 400–406 (2014).
- 792 23. Carmichael, S. T. & Price, J. L. Limbic connections of the orbital and medial prefrontal cortex in  
793 macaque monkeys. *J. Comp. Neurol.* **363**, 615–641 (1995).
- 794 24. Klavir, O., Genud-Gabai, R. & Paz, R. Functional connectivity between amygdala and cingulate  
795 cortex for adaptive aversive learning. *Neuron* **80**, 1290–1300 (2013).

- 796 25. Pesaran, B. *et al.* Investigating large-scale brain dynamics using field potential recordings: analysis  
797 and interpretation. *Nat. Neurosci.* **21**, 903 (2018).
- 798 26. Fries, P. A mechanism for cognitive dynamics: neuronal communication through neuronal coherence.  
799 *Trends Cogn. Sci.* **9**, 474–480 (2005).
- 800 27. Chang, S. W. C., Winecoff, A. A. & Platt, M. L. Vicarious reinforcement in rhesus macaques  
801 (*Macaca mulatta*). *Front. Neurosci.* **5**, (2011).
- 802 28. Chang, S. W. C., Barter, J. W., Ebitz, R. B., Watson, K. K. & Platt, M. L. Inhaled oxytocin amplifies  
803 both vicarious reinforcement and self reinforcement in rhesus macaques (*Macaca mulatta*). *Proc.*  
804 *Natl. Acad. Sci.* **109**, 959–964 (2012).
- 805 29. Paxinos, G., Huang, X.-F. & Toga, A. W. *The Rhesus Monkey Brain in Stereotaxic Coordinates*.  
806 (Academic Press, 1999).
- 807 30. Baccalá, L. A. & Sameshima, K. Partial directed coherence: a new concept in neural structure  
808 determination. *Biol. Cybern.* **84**, 463–474 (2001).
- 809 31. Buzsáki, G. & Wang, X.-J. Mechanisms of gamma oscillations. *Annu. Rev. Neurosci.* **35**, 203–225  
810 (2012).
- 811 32. Fries, P. Rhythms for cognition: Communication through coherence. *Neuron* **88**, 220–235 (2015).
- 812 33. Pesaran, B. *et al.* Investigating large-scale brain dynamics using field potential recordings: analysis  
813 and interpretation. *Nat. Neurosci.* **21**, 903–919 (2018).
- 814 34. Hipp, J. F., Engel, A. K. & Siegel, M. Oscillatory synchronization in large-scale cortical networks  
815 predicts perception. *Neuron* **69**, 387–396 (2011).
- 816 35. Womelsdorf, T., Fries, P., Mitra, P. P. & Desimone, R. Gamma-band synchronization in visual cortex  
817 predicts speed of change detection. *Nature* **439**, 733–736 (2006).
- 818 36. Wong, Y. T., Fabiszak, M. M., Novikov, Y., Daw, N. D. & Pesaran, B. Coherent neuronal ensembles  
819 are rapidly recruited when making a look-reach decision. *Nat. Neurosci.* **19**, 327–334 (2016).
- 820 37. Kahana, M. J., Sekuler, R., Caplan, J. B., Kirschen, M. & Madsen, J. R. Human theta oscillations  
821 exhibit task dependence during virtual maze navigation. *Nature* **399**, 781–784 (1999).

- 822 38. Fujisawa, S. & Buzsáki, G. A 4 Hz oscillation adaptively synchronizes prefrontal, VTA, and  
823 hippocampal activities. *Neuron* **72**, 153–165 (2011).
- 824 39. Adhikari, A., Topiwala, M. A. & Gordon, J. A. Synchronized activity between the ventral  
825 hippocampus and the medial prefrontal cortex during anxiety. *Neuron* **65**, 257 (2010).
- 826 40. Antzoulatos, E. G. & Miller, E. K. Increases in functional connectivity between prefrontal cortex and  
827 striatum during category learning. *Neuron* **83**, 216–225 (2014).
- 828 41. Brincat, S. L. & Miller, E. K. Frequency-specific hippocampal-prefrontal interactions during  
829 associative learning. *Nat. Neurosci.* **18**, 576–581 (2015).
- 830 42. Taub, A. H., Perets, R., Kahana, E. & Paz, R. Oscillations synchronize amygdala-to-prefrontal  
831 primate circuits during aversive learning. *Neuron* **97**, 291-298.e3 (2018).
- 832 43. Buschman, T. J. & Miller, E. K. Top-down versus bottom-up control of attention in the prefrontal and  
833 posterior parietal cortices. *Science* **315**, 1860–1862 (2007).
- 834 44. Engel, A. K., Fries, P. & Singer, W. Dynamic predictions: oscillations and synchrony in top-down  
835 processing. *Nat. Rev. Neurosci.* **2**, 704–716 (2001).
- 836 45. Engel, A. K. & Fries, P. Beta-band oscillations--signalling the status quo? *Curr. Opin. Neurobiol.* **20**,  
837 156–165 (2010).
- 838 46. Cardin, J. A. *et al.* Driving fast-spiking cells induces gamma rhythm and controls sensory responses.  
839 *Nature* **459**, 663–667 (2009).
- 840 47. Jia, X. & Kohn, A. Gamma rhythms in the brain. *PLOS Biol.* **9**, e1001045 (2011).
- 841 48. Livneh, U., Resnik, J., Shohat, Y. & Paz, R. Self-monitoring of social facial expressions in the  
842 primate amygdala and cingulate cortex. *Proc. Natl. Acad. Sci.* **109**, 18956–18961 (2012).
- 843 49. Gothard, K. M., Battaglia, F. P., Erickson, C. A., Spitler, K. M. & Amaral, D. G. Neural responses to  
844 facial expression and face identity in the monkey amygdala. *J. Neurophysiol.* **97**, 1671–1683 (2007).
- 845 50. Grabenhorst, F., Hernádi, I. & Schultz, W. Prediction of economic choice by primate amygdala  
846 neurons. *Proc. Natl. Acad. Sci.* **109**, 18950–18955 (2012).

- 847 51. Liu, Y., Yttri, E. A. & Snyder, L. H. Intention and attention: different functional roles for LIPd and  
848 LIPv. *Nat. Neurosci.* **13**, 495–500 (2010).
- 849 52. Chang, S. W. *et al.* Neural mechanisms of social decision-making in the primate amygdala. *Proc.*  
850 *Natl. Acad. Sci.* **112**, 16012–16017 (2015).
- 851 53. Chung, J. E. *et al.* A fully automated approach to spike sorting. *Neuron* **95**, 1381-1394.e6 (2017).
- 852 54. Bokil, H., Andrews, P., Kulkarni, J. E., Mehta, S. & Mitra, P. P. Chronux: a platform for analyzing  
853 neural signals. *J. Neurosci. Methods* **192**, 146–151 (2010).
- 854 55. Jarvis, M. R. & Mitra, P. P. Sampling properties of the spectrum and coherency of sequences of  
855 action potentials. *Neural Comput.* **13**, 717–749 (2001).
- 856 56. Sommerlade, L. *et al.* Time-variant estimation of directed influences during Parkinsonian tremor. *J.*  
857 *Physiol. Paris* **103**, 348–352 (2009).
- 858 57. Omidvarnia, A., Azemi, G., Boashash, B., O’Toole, J. M., Colditz, P. B., & Vanhatalo, S. (2013).  
859 Measuring time-varying information flow in scalp EEG signals: orthogonalized partial directed  
860 coherence. *IEEE transactions on biomedical engineering*, *61*(3), 680-693.
- 861 58. Saez, A., Rigotti, M., Ostojic, S., Fusi, S. & Salzman, C. D. Abstract Context Representations in  
862 Primate Amygdala and Prefrontal Cortex. *Neuron* **87**, 869–881 (2015).
- 863 59. Sutton, R. S., & Barto, A. G. *Reinforcement learning: An introduction*. MIT press. (2018)  
864  
865

## **Supplementary Information**

### **Specialized medial prefrontal-amygdala coordination in other-regarding decision preference**

Olga Dal Monte<sup>1,2</sup>, Cheng-Chi J. Chu<sup>1</sup>, Nicholas A. Fagan<sup>1</sup>, Steve W. C. Chang<sup>1,3,4,\*</sup>

1 Department of Psychology, Yale University, New Haven, CT 06520

2 Department of Psychology, University of Turin, Torino, Italy

3 Department of Neuroscience, Yale University School of Medicine, New Haven, CT 06510

4 Kavli Institute for Neuroscience, Yale University School of Medicine, New Haven, CT 06510

#### **Supplemental Information Contains:**

**Supplementary Results**

**Supplementary Figures S1–S11**

## Supplementary Results

### Absence of correlations between spike-field coherence and the magnitudes of firing rates or LFP power

To test whether the differences observed in spike-field coherence could have been driven simply by either the changes in spiking activity or LFP power *within* each brain region, we correlated the changes in firing rate or the changes in LFP power of each brain region with the observed  $BLA_{spike}-ACCg_{field}$  and  $ACCg_{spike}-BLA_{field}$  coherence patterns (**Fig. S3**). High, medium, and low magnitude quantiles from the firing rates of BLA cells were not correlated with the beta band  $BLA_{spike}-ACCg_{field}$  coherence values between the two ORPs (post-decision epoch,  $r = -0.12$ ,  $p = 0.43$ , Pearson correlation). Similarly, the firing rates of ACCg cells also did not relate to the gamma band  $ACCg_{spike}-BLA_{field}$  coherence values ( $r = 0.05$ ,  $p = 0.53$ ) (**Fig S3a**). Moreover, we found a similar pattern of results for LFP powers; the changes in the beta band  $BLA_{spike}-ACCg_{field}$  coherence had only trending relations with the beta band LFP power in ACCg ( $r = 0.10$ ,  $p = 0.05$ ) and changes in the gamma band  $ACCg_{spike}-BLA_{field}$  coherence were not correlated with the gamma band LFP power in BLA ( $r = -0.03$ ,  $p = 0.23$ ) (**Fig. S3b**) (also see **Fig. S4** for the time courses of LFP power in beta and gamma bands).

### Field-field coherence between BLA and ACCg does not account for spike-field coherence patterns

To establish if the observed spike-field coherence patterns were not merely driven by a more global-level synchrony or by common input signals, we examined field-field coherence values across the two areas, which are known to be more susceptible to such non-specific sources, in order to compare them to the spike-field coherence values (**Fig. S5c-d**).

Field-field coherence patterns were examined from 447 ACCg sites (241 and 206 sites in monkey H and K, respectively) and 402 BLA sites (211 and 191 sites in monkey H and K). During the post-decision epoch, we found no increase in the field-field coherence patterns in the beta band for positive ORP ( $p > 0.34$ , Wilcoxon sign rank) and also no decrease in the field-field coherence patterns for

negative ORP (all  $p > 0.21$ ) (**Fig. S5a**). Rather, we observed significantly enhanced field-field coherence values in the gamma band for negative ORP ( $p < 0.0001$ ), without any changes in the gamma band associated with positive ORP ( $p > 0.19$ ). We next compared the field-field coherence values between free-choice and forced-choice trials. We found a significant difference in the beta band field-field coherence between free- and forced-choice trials ( $p < 0.0001$ , Wilcoxon rank sum, **Fig S5b**), with a slight increase associated with free-choice and a strong decrease for forced-choice. In the gamma band, however, we did not observe any differences between the two trial types ( $p > 0.51$ ).

When we directly compared the spike-field coherence differences to the field-field coherence differences between positive and negative ORPs, we found a markedly stronger spike-field coherence patterns both in the beta and in gamma bands (post-decision epoch, both  $p < 0.0001$ , Wilcoxon rank sum) (**Fig. S5c**). Therefore, the observed spike-field coherence patterns differentiating positive ORP from negative ORP (**Fig. 3**) were not likely to be simply driven by common input signals to both ACCg and BLA, as these should be better indexed by their field-field patterns.

### **Within-region spike-field coherence in BLA or ACCg does not account for between-region spike-field coherence patterns**

To identify potential relationships between within-region and between-region coherence patterns, we compared the interareal spike-field coherence patterns directly to the within-region spike-field coherence patterns (**Fig. S6**). Differences in  $BLA_{\text{spike}}-BLA_{\text{field}}$  coherence between positive and negative ORPs increased diffusely before the time of decision not only in the beta band but also in a much wider gamma range (both frequency bands, both  $p < 0.0001$ , Wilcoxon sign rank; **Fig. S6a**). There were overall similar coherence differences on forced-choice trials when the computer determined the outcomes (both bands,  $p < 0.0001$ ) (**Fig. S6b**). On the other hand, differences in  $ACCg_{\text{spike}}-ACCg_{\text{field}}$  coherence between positive and negative ORPs increased around the time of decision in the gamma band (both  $p < 0.0001$ ; **Fig. S6a**). This coherence difference was not present in the absence of decision-making on forced-choice trials ( $p = 0.28$ ; **Fig. S6b**).



Next, we directly compared the within-region and the between-region spike-field coherence patterns. The  $ACC_{\text{spike}}-ACC_{\text{field}}$  coherence differences between the two ORPs were substantially weaker compared to the  $BLA_{\text{spike}}-ACC_{\text{field}}$  coherence differences in the beta band ( $p < 0.0001$ , Wilcoxon rank sum; **Fig. S6c-d**). Moreover, although the  $BLA_{\text{spike}}-BLA_{\text{field}}$  coherence differences between the two ORPs were more comparable to the  $ACC_{\text{spike}}-BLA_{\text{field}}$  coherence differences in the gamma band ( $p = 0.12$ ), the peak of the within-region coherence differences occurred prior to the time of choice and these values were in the process of decreasing toward the baseline during the post-decision epoch (**Fig. S6c-d**). Therefore, although the within-region spike-field coherence patterns showed interesting and systematic effects, there were several notable differences compared to the between-region spike-field coherence patterns (**Fig. 3**).

### **Different ways of contrasting positive and negative ORP replicate the main coherence findings**

To investigate whether the original spike-field and field-field coherence findings were not due to the directions of the contrasts we chose, we performed the identical coherence analyses (spike-field coherence, **Fig. S7** and field-field coherence, **Fig. S8**) for the following additional contrasts: *Both-Self* and for *Bottle-Other* (type 2 contrast) to capture the same concept of other-regarding (in this case *Both* over *Self*) and non-other regarding (in this case *Bottle* over *Other*) where the chosen options are orthogonal to the preference itself. Notably, these contrasts now instead derive positive ORP from the *Self/Both* context (rather than from the *Other/Bottle* context) and negative ORP from the *Other/Bottle* context (rather than from the *Self/Both* context). Spike-field coherence in the *Both-Self* contrast exhibited a similar increase in coherence patterns in the beta and gamma band as in the *Other-Bottle* contrast (both  $p > 0.4$ , Wilcoxon sign rank) (both contrasts examining the effect of delivering juice reward to the conspecific). Similarly, we observed a consistent decrease in the beta and gamma bands both when the actors chose *Self* over *Both* and *Bottle* over *Other* (both  $p > 0.4$ ) (both contrasts now examining the effect of not delivering juice reward to the conspecific) (**Fig. S7**).

The field-field coherence values for the *Both-Self* contrast exhibited a similar increase in their coherence patterns to the beta band as in the *Other-Bottle* contrast (both  $p > 0.22$ , Wilcoxon sign rank).

For the gamma band field-field coherence, however, the *Both–Self* contrast showed a more decrease compared to the original contrast ( $p < 0.0001$ ). We observed a consistent decrease in the beta band field-field coherence both when the actors chose *Self* over *Both* and *Bottle* over *Other* (both  $p > 0.22$ , Wilcoxon sign rank), but again showed a more decrease in the gamma band field-field coherence values for *Both–Self* contrast compared to the original contrast ( $p < 0.0001$ ) (**Fig. S8**). These results suggest that the coherence signatures reported were not the mere product of a preferred choice or being in a specific context but were instead driven by the reward outcome of the conspecific monkey.

### **Additional Spike-field coherence analyses**

To test if the changes in spike-field coherence patterns were not related to simpler sensory-evoked responses, we calculated spike-field coherence values upon the onset of a gray fixation square in the task (from 50 to 150 ms relative to the stimulus onset). We did not observe any significant differences between  $ACC_{\text{spike}}-BLA_{\text{field}}$  and  $BLA_{\text{spike}}-ACC_{\text{field}}$  coherences in both the beta ( $p = 0.92$ , Wilcoxon rank sum) and the gamma band ( $p = 0.36$ ) (**Fig. S9**).

We also performed an additional analysis for the observed spike-field coherence, in which, for each of 1000 iterations, 75% of randomly selected trials were used to recalculate spike-field coherence. These resampled datasets produced consistent results, confirming that our results were not driven by outlier cells, sites, or trials (positive versus negative ORPs:  $BLA_{\text{spike}}-ACC_{\text{field}}$  coherence in the beta band,  $p = 0.005$ ;  $ACC_{\text{spike}}-BLA_{\text{field}}$  coherence in the gamma band,  $p = 0.001$ ; Wilcoxon sign rank).

## Supplementary Figures and Legends (Figs. S1–S11)

### Figure S1

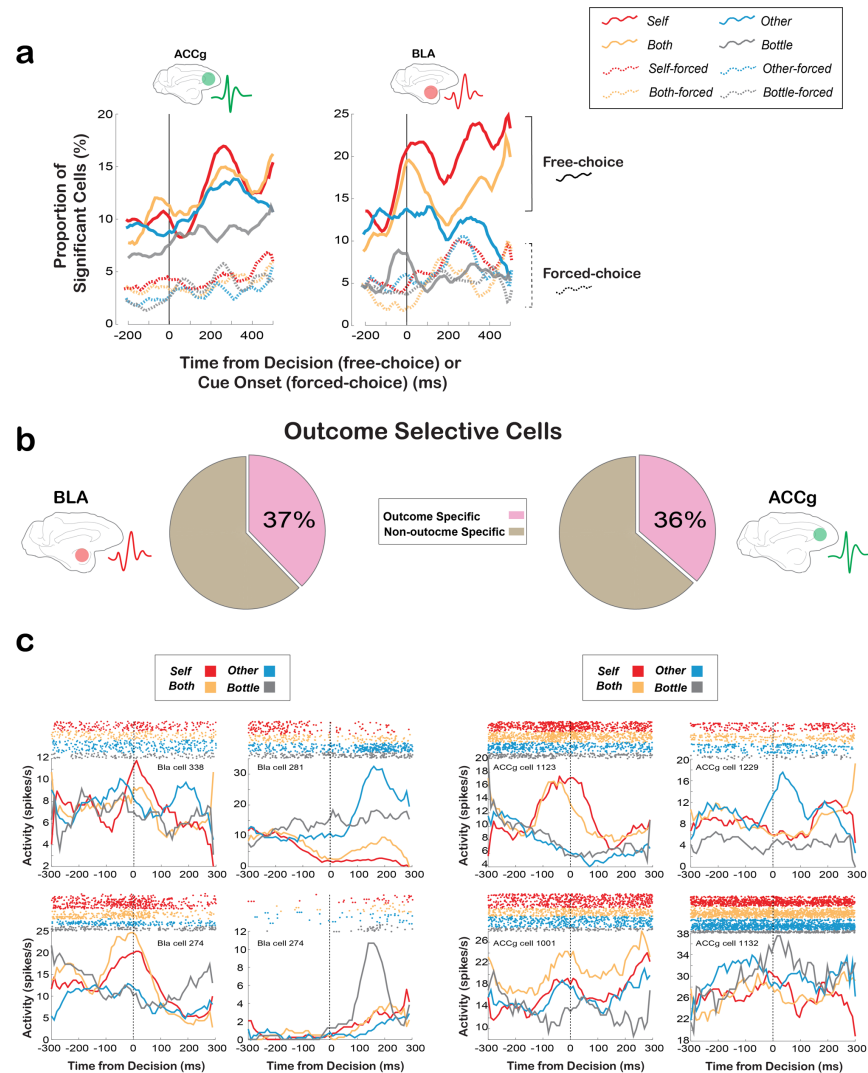

**Fig. S1. Single neuron summary for encoding *Self*, *Other*, *Both*, and *Bottle* reward outcomes for free-choice and forced-choice trials in BLA and ACCg.** (a) Proportions of all recorded cells in ACCg (left) and BLA (right) that exhibited significant firing rate modulations in *Self* (purple), *Both* (orange), *Other* (blue), or *Bottle* (gray) condition across time relative to the baseline fixation epoch ( $p < 0.05$ , Wilcoxon sign rank). Data from free-choice trials (solid lines) are aligned to the time of decision, whereas data from forced-choice trials (dashed lines) are aligned to the time of cue onset. Note that this analysis examined the time bins in which spikes obtained within *each* outcome condition showed significant difference from its own baseline. (b) Pie charts showing the proportions of outcome selective cells in BLA and ACCg. (c) Example outcome selective cells in BLA and ACCg. For each area, we show four example cells, each with different outcome-related modulations.

## Figure S2

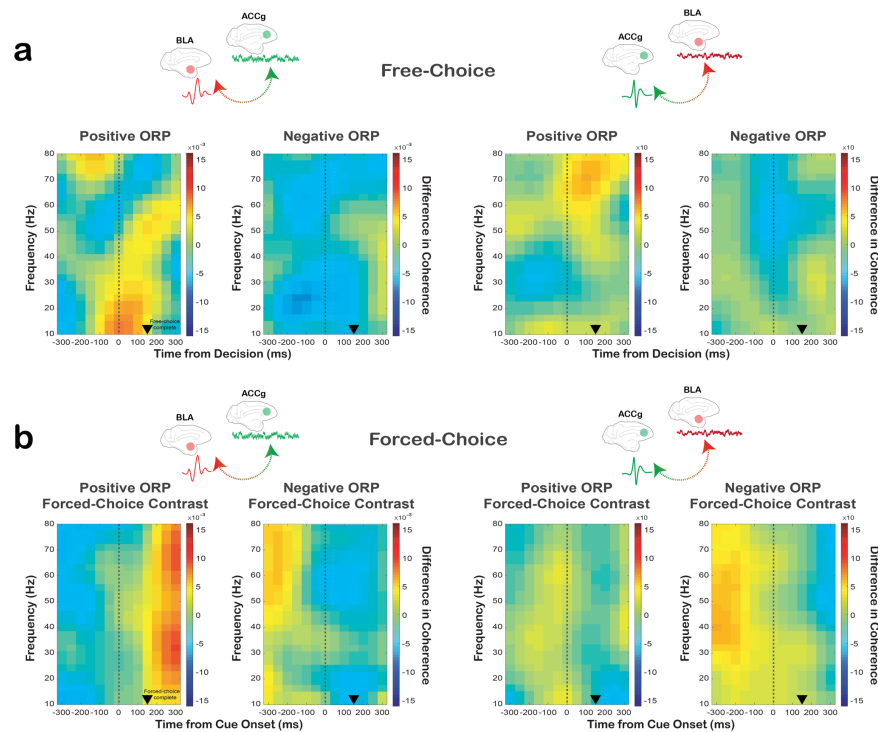

**Fig. S2. Spike-field coherence between ACCg and BLA cells separately for positive ORP and negative ORP as well as for similar contrasts constructed from forced-choice trials. (a)** BLA<sub>spike</sub>-ACCg<sub>field</sub> coherence (left) and ACCg<sub>spike</sub>-BLA<sub>field</sub> coherence (right) across time and frequency separately for when monkeys actively expressed either positive ORP (choosing *Other* over *Bottle*, *Other-Bottle*) or negative ORP (choosing *Self* over *Both*, *Self-Both*) on free-choice trials. Data are aligned to the time of decision on free-choice trials. **(b)** BLA<sub>spike</sub>-ACCg<sub>field</sub> coherence (left) and ACCg<sub>spike</sub>-BLA<sub>field</sub> coherence (right) across time and frequency separately for when monkeys were presented with computer-determined outcomes on forced-choice trials, contrasting *Other-forced* over *Bottle-forced* to generate positive ORP forced-choice contrast (*Other-forced* - *Bottle-forced*) and *Self-forced* over *Both-forced* to generate negative ORP forced-choice contrast (*Self-forced* - *Both-forced*). Thus, these forced-choice contrasts matched the contrasts used for positive ORP (choosing *Other* over *Bottle*) and negative ORP (choosing *Self* over *Both*) with respect to reward outcome. Data are aligned to the time of cue onset on forced-choice trials. In all plots, the black arrowheads mark the time at which the monkeys completed a free-choice or forced-choice decision by maintaining fixation on a chosen target or cue for 150 ms.

## Figure S3

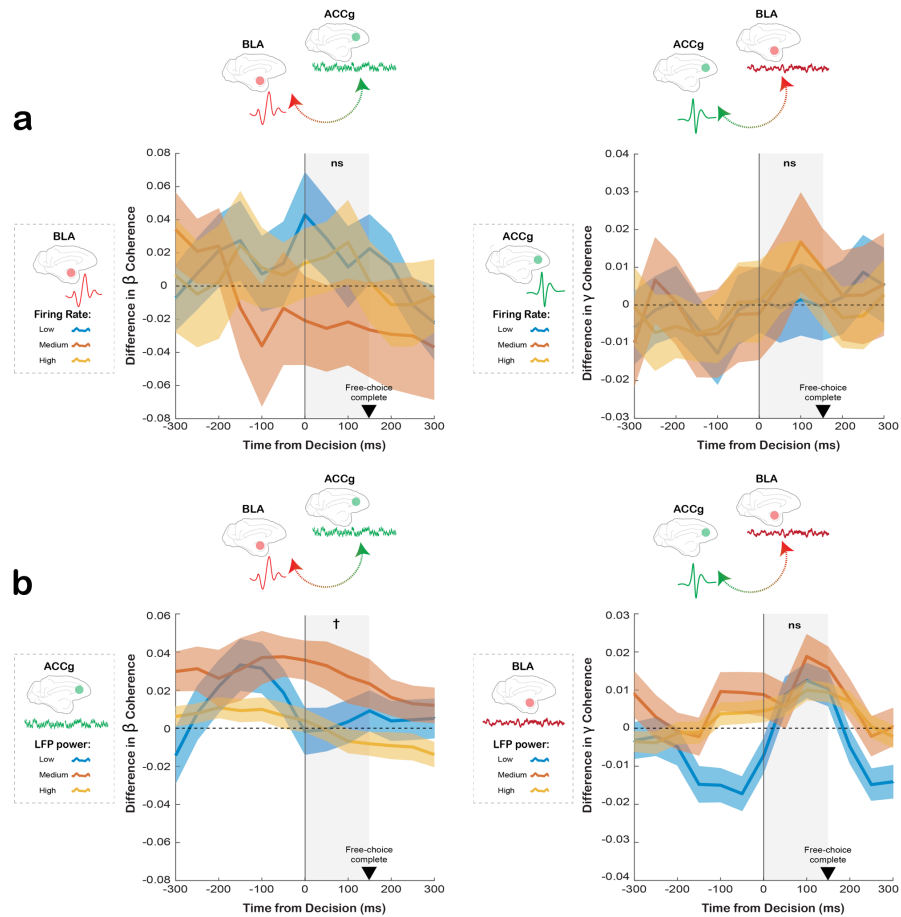

**Fig. S3. Absence of correlations between the observed spike-field coherence values and the magnitudes of firing rates and LFP power in both BLA and ACCg. (a)** Differences in the beta  $BLA_{spike}-ACCg_{field}$  (left) and the gamma  $ACCg_{spike}-BLA_{field}$  (right) coherence values between positive ORP and negative ORP over time as a function of high, medium, low magnitude quantiles from the firing rates of BLA cells (left) and ACCg cells (right) used in the corresponding spike-field calculations. There were no correlations between the spike-field coherence values across different firing rates of the cells for both comparisons (both  $p > 0.43$ , Pearson's correlation, indicated by ns). **(b)** Differences in the beta  $BLA_{spike}-ACCg_{field}$  (left) and the gamma  $ACCg_{spike}-BLA_{field}$  (right) coherence values between positive ORP and negative ORP over time as a function of high, medium, low magnitude quantiles from the LFP powers in ACCg sites (left) and BLA sites (right) used in the corresponding spike-field calculations. There was a weak correlation in the beta band ( $p = 0.05$ , indicated by †) but not in the gamma band ( $p > 0.23$ , indicated by ns).

## Figure S4

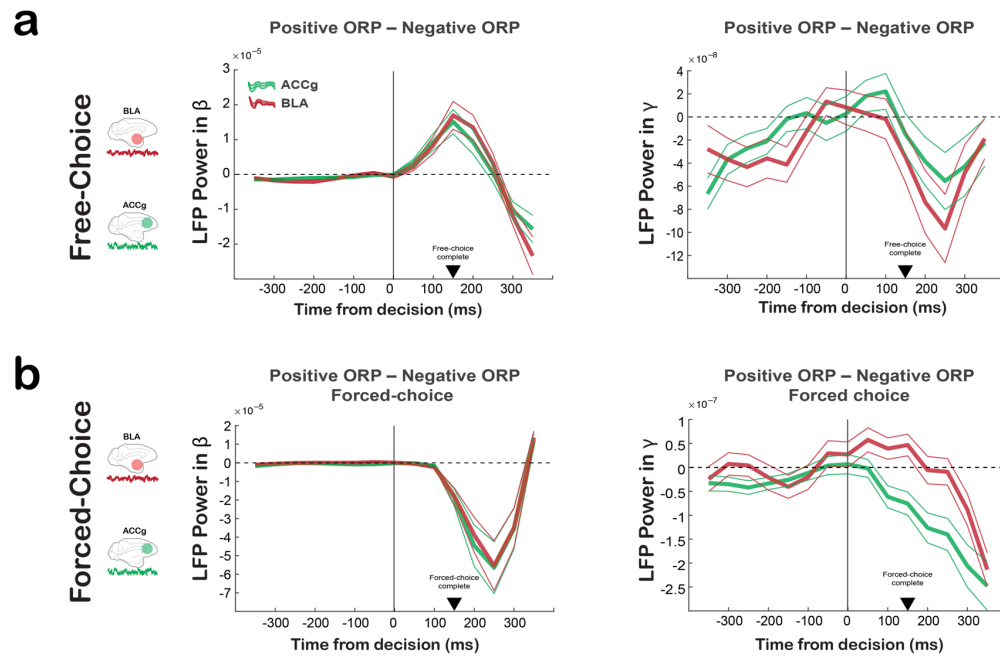

**Fig. S4 Time courses of LFP powers in the beta and gamma bands in BLA and ACCg with respect to the differences between positive and negative ORPs for both free-choice and forced-choice trials. (a) Differences in the beta (left) and the gamma LFP powers (right) between positive ORP and negative ORP over time in BLA and ACCg on free-choice trials. (b) Differences in the beta (left) and the gamma LFP powers (right) over time in BLA and ACCg on forced-choice trials, contrasting *Other-forced* over *Bottle-forced* to generate positive ORP forced-choice contrast and *Self-forced* over *Both-forced* to generate negative ORP forced-choice contrast (thus, matching the contrasts across free-choice and forced-choice trials with respect to reward outcome). Except for the gamma band LFP on forced-choice trials (right in the panel b), the LFP powers between BLA and ACCg exhibited highly similar modulation time courses. Interestingly, whereas the beta band LFP power differences between the two ORPs markedly increased in both BLA and ACCg following the time of decision on free-choice trials, the same beta band LFP power differences markedly decreased similarly in both areas following cue onset on forced-choice trials.**

## Figure S5

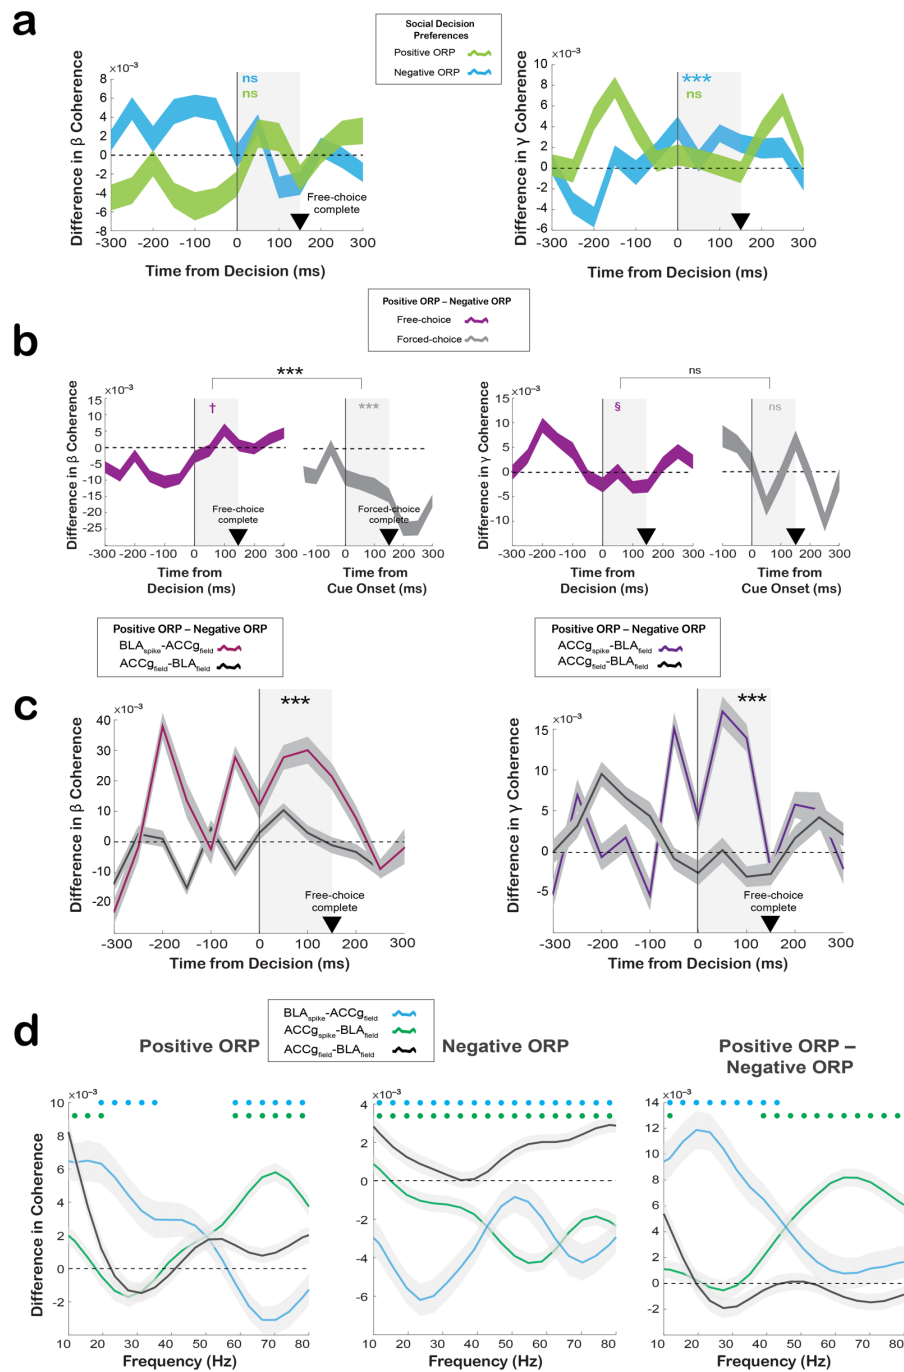

**Fig. S5. Field-field coherence between ACCg and BLA.** (a) Time courses of field-field coherence values in the beta frequency (left, 15–25 Hz) and the gamma frequency (right, 45–70 Hz) separately for positive ORP (light green; *Other–Bottle*) and negative ORP (light blue; *Self–Both*). (b) Time courses of beta (left) and gamma (right) band field-field coherence contrasting between the two ORPs on free-choice trials (purple) and forced-choice (forced-choice constructs; see the figure legend in S4) (grey). (c) Time courses of coherence differences between the two ORPs on free-choice trials in the beta frequency (left) and the gamma frequency (right) separately for the field-field (dark grey), BLA<sub>spike</sub>-ACCg<sub>field</sub> (dark pink), and ACCg<sub>spike</sub>-BLA<sub>field</sub> relations (purple). In a–c, significant coherence differences between the traces

(Wilcoxon rank sum) are indicated in black asterisks for the analyzed epoch (gray shading) (\*\*\*,  $p < 0.0001$ ; ns, not significant). In **a–c**, the black arrowheads mark the time at which the monkeys completed a free-choice or forced-choice decision by maintaining fixation on a chosen target or cue for 150 ms. **(d)** Differences between  $BLA_{spike}-ACC_{field}$  (light blue),  $ACC_{gspike}-ACC_{gfield}$  (green) and  $ACC_{field}-BLA_{field}$  (dark gray) coherence values across frequency during the post-decision epoch for positive ORP, negative ORP, and for the contrast between the two ORPs. Circles above the lines (in matching colors) show significant differences from the spike-field pairs from the  $ACC_{field}-BLA_{field}$  coherence values ( $p < 0.05$ , Wilcoxon sign rank).



**Figure S6**

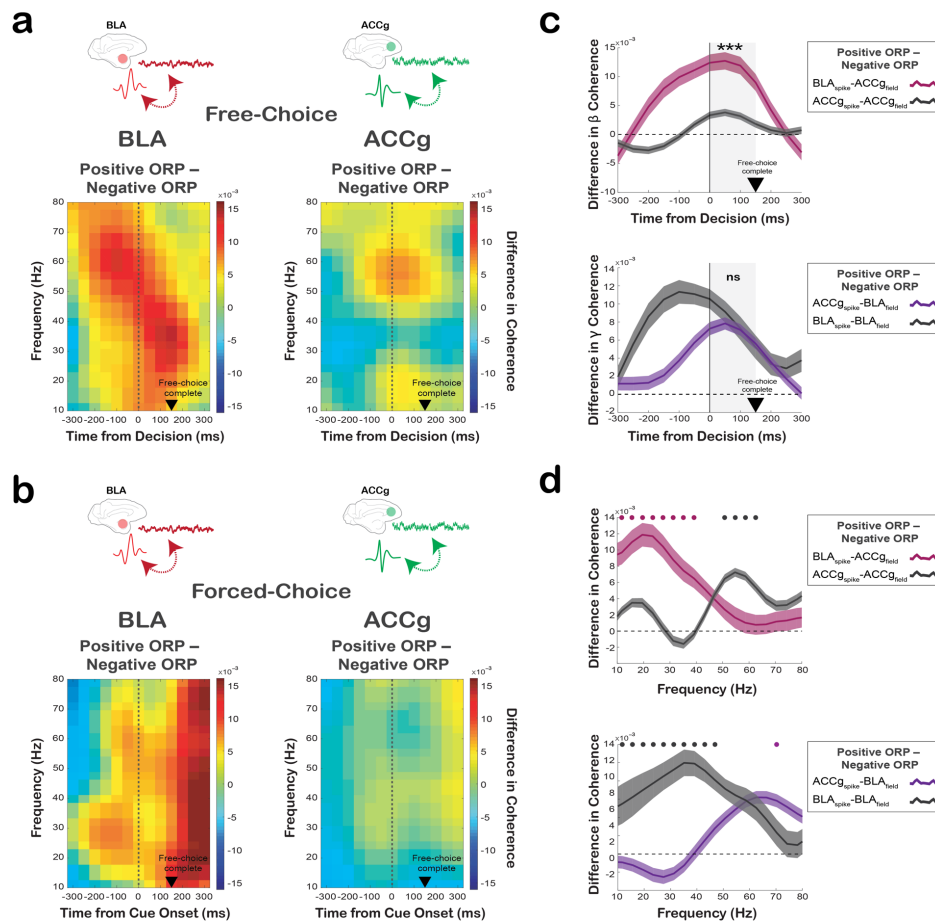

**Fig. S6. Local, within-region spike-field coherence in ACCg and BLA for positive ORP compared to negative ORP.** (a) Differences in BLA<sub>spike</sub>-BLA<sub>field</sub> coherence (left) and ACCg<sub>spike</sub>-ACCg<sub>field</sub> coherence (right) across time and frequency when monkeys actively expressed positive ORP (choosing *Other* over *Bottle*) versus negative ORP (choosing *Self* over *Both*) on free-choice trials. Data are aligned to the time of free-choice decision. (b) Differences in BLA<sub>spike</sub>-BLA<sub>field</sub> coherence (left) and ACCg<sub>spike</sub>-ACCg<sub>field</sub> coherence (right) across time and frequency when monkeys were presented with computer-determined outcomes on forced-choice trials, contrasting *Other-forced* over *Bottle-forced* to generate positive ORP forced-choice contrast and *Self-forced* over *Both-forced* to generate negative ORP forced-choice contrast (thus, matching the contrasts across free-choice and forced-choice trials with respect to reward outcome). Data are aligned to the time of cue onset on forced-choice trials. (c) (Top) Time courses of spike-field coherence differences between the two ORPs on free-choice trials in the beta band separately for BLA<sub>spike</sub>-ACCg<sub>field</sub> (dark pink) and BLA<sub>spike</sub>-BLA<sub>field</sub> (dark gray). (Bottom) Time courses of spike-field coherence differences between the two ORPs on free-choice trials in the gamma band separately for ACCg<sub>spike</sub>-BLA<sub>field</sub> (purple) and ACCg<sub>spike</sub>-ACCg<sub>field</sub> (dark gray). Significant coherence differences between traces are indicated in black asterisks for the analyzed epoch (gray shading) (\*\*\*,  $p < 0.0001$ ; ns, not significant, Wilcoxon rank sum). (d) Differences between BLA<sub>spike</sub>-ACCg<sub>field</sub> (dark pink) and BLA<sub>spike</sub>-BLA<sub>field</sub> (dark gray) coherence values across frequency during the post-decision epoch (top) and between ACCg<sub>spike</sub>-BLA<sub>field</sub> (purple) and ACCg<sub>spike</sub>-ACCg<sub>field</sub> (dark gray) values across frequency during the post-decision epoch (bottom). Circles above the lines (in matching colors) show significant differences from

the spike-field pairs from the  $ACC_{\text{field}}-BLA_{\text{field}}$  coherence values ( $p < 0.05$ , Wilcoxon sign rank). In **a–c**, the black arrowheads mark the time at which the monkeys completed a free-choice or a forced-choice decision by maintaining the fixation on a target or cue for 150 ms.

## Figure S7

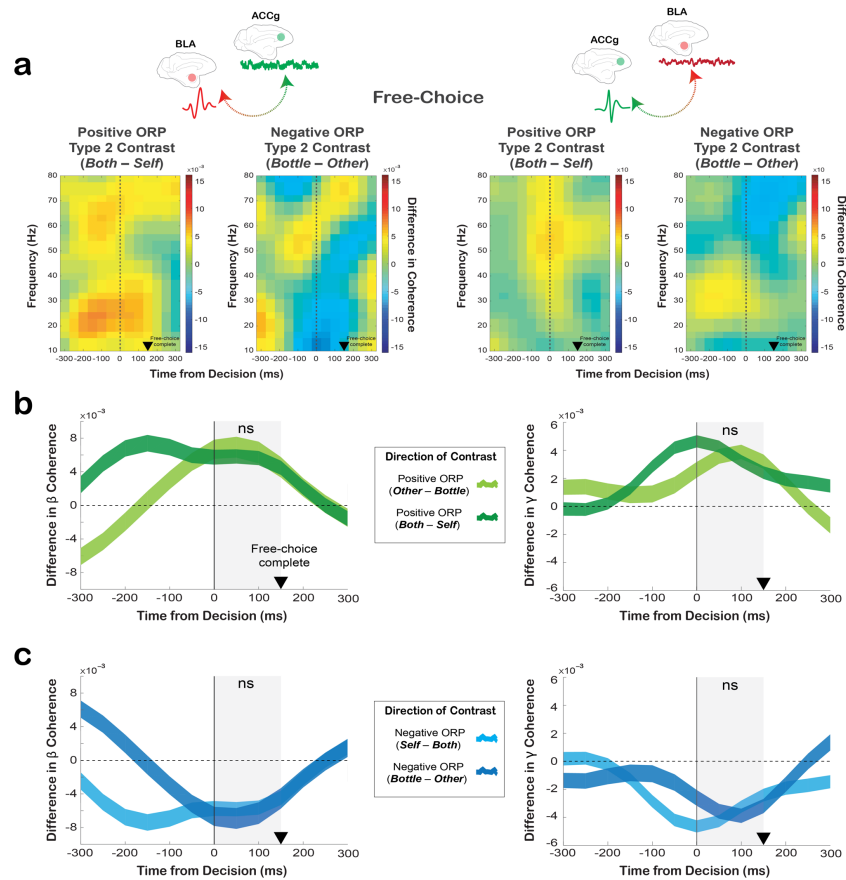

**Fig. S7. Different ways of contrasting positive and negative ORPs (type 2 contrasts) replicate the main spike-field coherence findings.** (a) Free-choice spectrograms showing the BLA<sub>spike</sub>-ACCg<sub>field</sub> coherence (left two panels) and ACCg<sub>spike</sub>-BLA<sub>field</sub> coherence (right two panels) values after applying the type 2 contrasts (positive ORP now derived from the *Self/Both* context as *Both-Self*; negative ORP now derived from the *Other/Bottle* context as *Bottle-Other*). (b) Comparisons over time for the beta BLA<sub>spike</sub>-ACCg<sub>field</sub> coherence (left) and the gamma ACCg<sub>spike</sub>-BLA<sub>field</sub> coherence (right) values between the original positive ORP contrast (*Other-Bottle*) and the type 2 positive ORP contrast (*Both-Self*). Although there were differences between the two contrasts prior to making a choice, the two contrasts yielded comparable coherence values in both comparisons (both  $p > 0.41$ , Wilcoxon sign rank). (c) Comparisons over time for the beta BLA<sub>spike</sub>-ACCg<sub>field</sub> coherence (left) and the gamma ACCg<sub>spike</sub>-BLA<sub>field</sub> coherence (right) values between the original negative ORP contrast (*Self-Both*) and the type 2 negative ORP contrast (*Bottle-Other*). Although there were differences between the two contrasts prior to making a choice, the two contrasts yielded comparable coherence values in both comparisons (both  $p > 0.41$ ).

## Figure S8

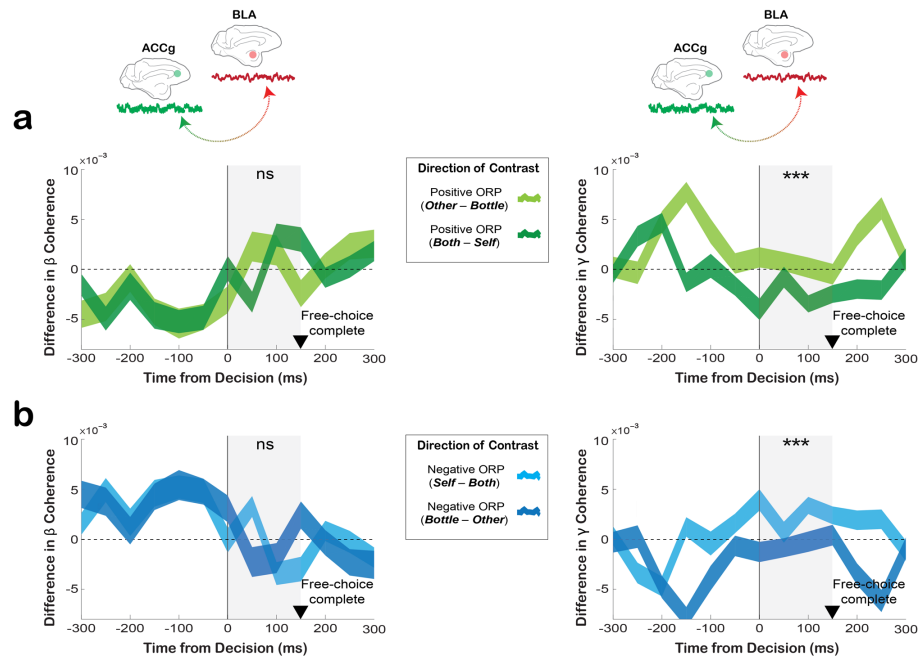

**Fig. S8. Different ways of contrasting positive and negative ORPs (type 2 contrasts) for the field-field coherence between BLA and ACCg.** (a) Comparisons over time for the beta BLAspike-ACCgfield coherence (left) and the gamma BLA<sub>field</sub>-ACCg<sub>field</sub> coherence (right) values between the original positive ORP contrast (*Other-Bottle*) and the type 2 positive ORP contrast derived from the *Self/Both* context (*Both-Self*). No coherence differences were found in the beta band ( $p > 0.22$ , Wilcoxon sign rank). In the gamma band, the type 2 contrast showed reduced coherence values in the main analysis epoch (grey shading) compared to the original contrast ( $p < 0.0001$ ). (b) Comparisons over time for the beta BLA<sub>field</sub>-ACCg<sub>field</sub> coherence (left) and the gamma BLA<sub>field</sub>-ACCg<sub>field</sub> coherence (right) values between the original negative ORP contrast (*Self-Both*) and the type 2 negative ORP contrast derived from the *Other/Both* context (*Bottle-Other*). Again, no coherence differences were found in the beta band ( $p > 0.22$ ), but the original contrast showed increased coherence values in the main analysis epoch (grey shading) compared to the type 2 contrast ( $p < 0.0001$ ).

## Figure S9

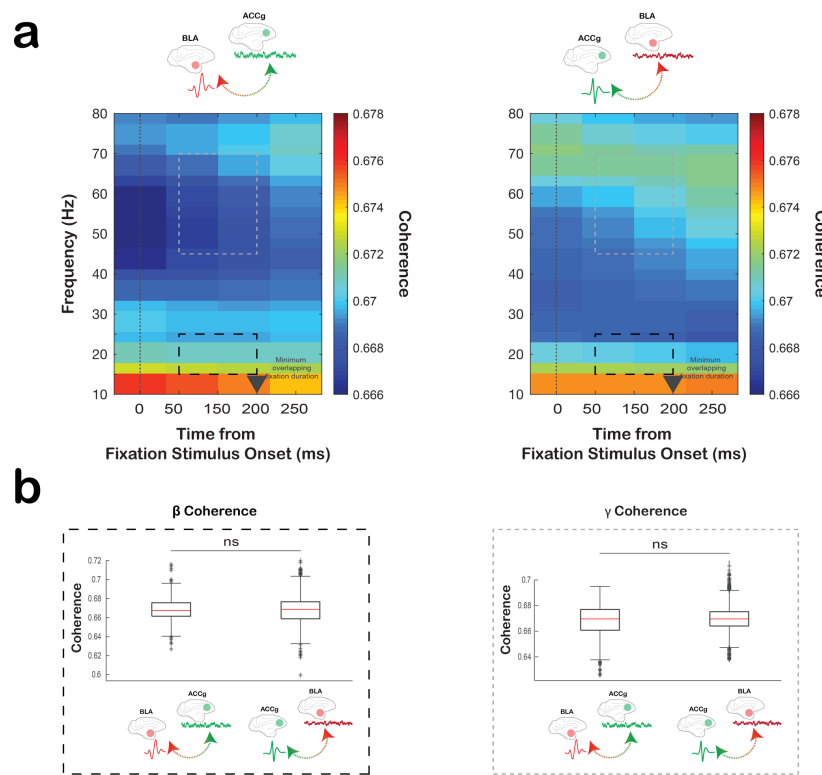

**Fig. S9. Spike-field coherence values between BLA and ACCg upon the onset of visual fixation stimulus.** (a) Spectrograms showing the BLA<sub>spike</sub>-ACCg<sub>field</sub> coherence (left) and ACCg<sub>spike</sub>-BLA<sub>field</sub> coherence (right) values aligned to the onset of fixation stimulus (grey fixation square). Monkeys were required to fixate on this stimulus upon its onset for at least 200 ms. (b) Quantifications of the beta (left, 15–25Hz) and gamma (right, 45–75Hz) coherence values in the 50–200 ms period relative to the fixation stimulus onset between the BLA<sub>spike</sub>-ACCg<sub>field</sub> coherence and ACCg<sub>spike</sub>-BLA<sub>field</sub> coherence values. No differential coherence values were observed between the two coherence pairs for both frequency bands (beta  $p > 0.92$ , gamma  $p > 0.36$ , Wilcoxon rank sum).

## Figure S10

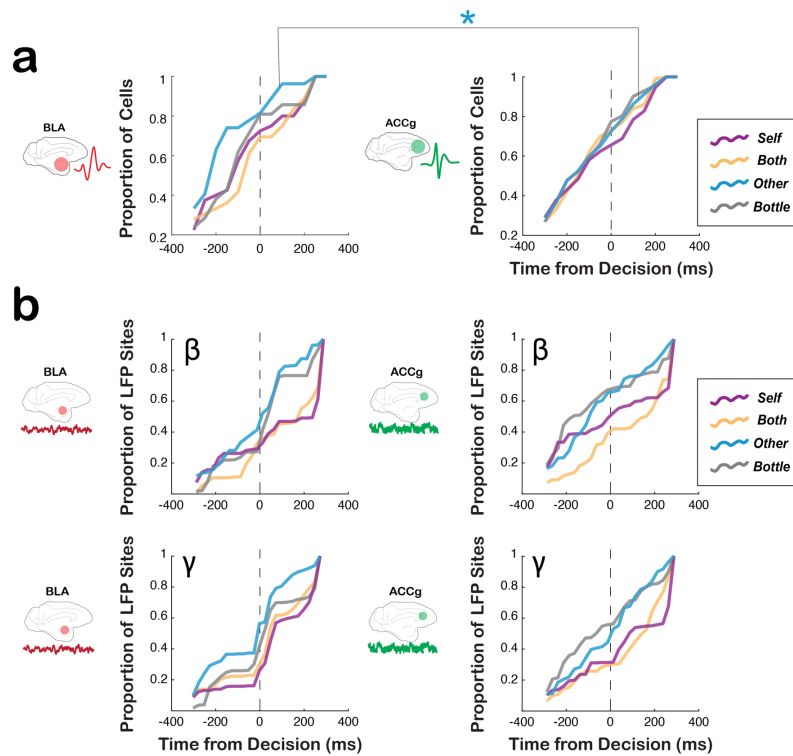

**Fig. S10. Emergence times for outcome-related signals for spikes and LFP powers in BLA and ACCg.** (a) Cumulative histograms showing the time points at which BLA cells (left) and ACCg cells (right) began to show significant outcome-related signals, separately for *Self*, *Both*, *Other*, and *Bottle*. Between BLA and ACCg, only *Other* choice signals emerged earlier in BLA than ACCg (\*,  $p < 0.001$ , Kolmogorov–Smirnov test). All the other comparisons between the two areas had comparable cumulative distributions (all,  $p > 0.08$ ). (b) Cumulative histograms showing the time points at which BLA (left) and ACCg LFP sites (right) began to show significant outcome-related LFP power signals compared to baseline, separately for *Self*, *Both*, *Other*, and *Bottle*, and separately for the beta (top row) and gamma bands (bottom row). All comparisons within the same frequency band between the two areas had comparable cumulative distributions (all,  $p > 0.38$ ).

## Figure S11

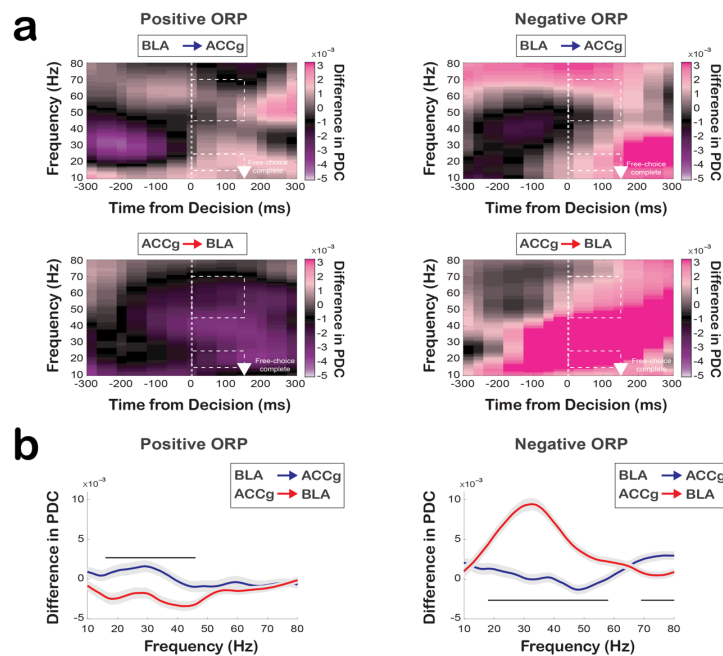

**Fig. S11. Directionality of information flow between BLA and ACCg for computer-determined outcomes on forced-choice trials as a function of time and frequency.** (a) Frequency-domain directional influences assessed by partial directed coherence (PDC) when monkeys were presented with computer-determined outcomes (forced-choice trials). PDC values as a function of time and frequency for *Other-forced* over *Bottle-forced* (positive ORP forced-choice contrast; see the legend in Fig. S2) for BLA→ACCg (top left) and ACCg→BLA (bottom left), and PDC values for *Self-forced* over *Both-forced* (negative ORP forced-choice contrast) for BLA→ACCg (top right) and ACCg→BLA (bottom right). Data are aligned to the time of cue onset. The white arrowheads mark the time at which the monkeys completed a forced-choice decision by maintaining fixation on a chosen target for 150 ms. Dotted lines indicate the beta (15–25 Hz) and gamma (45–70 Hz) band for the post-decision epoch. (b) Quantifications of the directional information flow on forced-choice trials as a function of frequency for positive ORP decision (left) and negative ORP (right) for BLA→ACCg (in blue) and ACCg→BLA (in red). In b horizontal lines indicate significant different between BLA→ACCg and ACCg→BLA ( $p < 0.05$ , Wilcoxon sign rank). Shaded regions represent standard errors.
